1 Managing flowering time in *Miscanthus* and sugarcane to facilitate intra- and intergeneric  
2 crosses

3 Hongxu Dong<sup>1, #a</sup>, Lindsay V. Clark<sup>1</sup>, Xiaoli Jin<sup>2</sup>, Kossonou Anzoua<sup>3</sup>, Larisa Bagmet<sup>4</sup>, Pavel  
4 Chebukin<sup>4</sup>, Elena Dzyubenko<sup>4</sup>, Nicolay Dzyubenko<sup>4</sup>, Bimal Kumar Ghimire<sup>5</sup>, Kweon Heo<sup>6</sup>,  
5 Douglas A. Johnson<sup>7</sup>, Hironori Nagano<sup>3</sup>, Andrey Sabitov<sup>4</sup>, Junhua Peng<sup>8</sup>, Toshihiko Yamada<sup>3</sup>, Ji  
6 Hye Yoo<sup>6</sup>, Chang Yeon Yu<sup>6</sup>, Hua Zhao<sup>9</sup>, Stephen P. Long<sup>1</sup>, and Erik J. Sacks<sup>1\*</sup>

7 <sup>1</sup>Department of Crop Sciences, University of Illinois at Urbana-Champaign, Urbana, Illinois,  
8 USA; <sup>2</sup>Department of Agronomy, Zhejiang University, Hangzhou, Zhejiang, China, <sup>3</sup>Field  
9 Science Center for Northern Biosphere, Hokkaido University, Sapporo, Hokkaido, Japan;  
10 <sup>4</sup>Vavilov All-Russian Institute of Plant Genetic Resources, St. Petersburg, Russian Federation;  
11 <sup>5</sup>Konkuk University, Neungdong-ro, Gwangjin-gu, South Korea; <sup>6</sup>Department of Applied Plant  
12 Sciences, Kangwon National University, Chuncheon, South Korea; <sup>7</sup>USDA-ARS Forage and  
13 Range Research Lab, Utah State University, Logan, Utah, USA; <sup>8</sup>HuaZhi Biotechnology  
14 Institute, Changsha Hunan, China; College of Plant Science and Technology, <sup>9</sup>Huazhong  
15 Agricultural University, Wuhan, China

16 <sup>#a</sup>Current Address: Department of Plant and Soil Sciences, Mississippi State University, Starkville,  
17 Mississippi, USA

18 \*Corresponding author: [esacks@illinois.edu](mailto:esacks@illinois.edu)

19

## 20 **Abstract**

21 *Miscanthus* is a close relative of *Saccharum* and a potentially valuable genetic resource for  
22 improving sugarcane. Differences in flowering time within and between *Miscanthus* and  
23 *Saccharum* hinders intra- and interspecific hybridizations. A series of greenhouse experiments  
24 were conducted over three years to determine how to synchronize flowering time of *Saccharum*  
25 and *Miscanthus* genotypes. We found that day length was an important factor influencing when  
26 *Miscanthus* and *Saccharum* flowered. Sugarcane could be induced to flower in a central Illinois  
27 greenhouse using supplemental lighting to reduce the rate at which days shortened during the  
28 autumn and winter to 1 min d<sup>-1</sup>, which allowed us to synchronize the flowering of some  
29 sugarcane genotypes with *Miscanthus* genotypes primarily from low latitudes. In a  
30 complementary growth chamber experiment, we evaluated 33 *Miscanthus* genotypes, including  
31 28 *M. sinensis*, 2 *M. floridulus*, and 3 *M. × giganteus* collected from 20.9° S to 44.9° N for  
32 response to three day lengths (10 h, 12.5 h, and 15 h). High latitude-adapted *M. sinensis*  
33 flowered mainly under 15 h days, but unexpectedly, short days resulted in short, stocky plants  
34 that did not flower; in some cases, flag leaves developed under short days but heading did not  
35 occur. In contrast, for *M. sinensis* and *M. floridulus* from low latitudes, shorter day lengths  
36 typically resulted in earlier flowering, and for some low latitude genotypes, 15 h days resulted in  
37 no flowering. However, the highest ratio of reproductive shoots to total number of culms was  
38 typically observed for 12.5 h or 15 h days. Latitude of origin was significantly associated with  
39 culm length, and the shorter the days, the stronger the relationship. Nearly all entries achieved  
40 maximal culm length under the 15 h treatment, but the nearer to the equator an accession  
41 originated, the less of a difference in culm length between the short-day treatments and the 15 h  
42 day treatment. Under short days, short culms for high-latitude accessions was achieved by  
43 different physiological mechanisms for *M. sinensis* genetic groups from the mainland in  
44 comparison to those from Japan; for mainland accessions, the mechanism was reduced internode  
45 length, whereas for Japanese accessions the phyllochron under short days was greater than under  
46 long days. Thus, for *M. sinensis*, short days typically hastened floral induction, consistent with  
47 the expectations for a facultative short-day plant. However, for high latitude accessions of *M.*  
48 *sinensis*, days less than 12.5 h also signaled that plants should prepare for winter by producing  
49 many short culms with limited elongation and development; moreover, this response was also

50 epistatic to flowering. Thus, to flower *M. sinensis* that originates from high latitudes  
51 synchronously with sugarcane, the former needs day lengths >12.5 h (perhaps as high as 15 h),  
52 whereas that the latter needs day lengths <12.5 h.

53

## 54 **Introduction**

55 *Miscanthus* is an emerging bioenergy biomass crop in North America and Europe (Heaton *et al.*,  
56 2008; Somerville *et al.*, 2010). As a C<sub>4</sub> perennial grass, *Miscanthus* is native to eastern Asia and  
57 Oceania from tropical to cold-temperate environments (Sacks *et al.*, 2013). However, currently  
58 only one single triploid clone of *M. ×giganteus*, which is an interspecific hybrid between *M.*  
59 *sinensis* and *M. sacchariflorus*, is widely available for commercial production and new hybrids  
60 are needed. Additionally, *Miscanthus* is a close relative to *Saccharum* and is potentially a  
61 valuable genetic resource for improving sugarcane (Chen & Lo, 1988; Lam *et al.*, 2009;  
62 Głowacka *et al.*, 2016; Kar *et al.*, 2019, 2020).

63 Control of flowering time is important to plant breeders because it allows them to make  
64 crosses of their choosing. Constraints on which genotypes can be used as parents in crosses  
65 would be severe impediments to plant improvement. Synchronization of flowering time between  
66 sugarcane and *Miscanthus* is necessary for making intergeneric crosses between these two  
67 species, because, like most warm-season grasses, pollen of these two genera quickly loses  
68 viability within the first ~2 h of dehiscence under typical growing conditions (Sartoris, 1942;  
69 Krishnamurth, 1980; Zhao *et al.*, 2009; Rounsaville *et al.*, 2011). Moreover, because *Saccharum*  
70 and *Miscanthus* pollen is typically intolerant of desiccation, it is not readily stored frozen; thus,  
71 consistently effective and long-term pollen-storage methods have not yet been developed for  
72 these genera.

73 *M. sacchariflorus* has been considered quantitative short-day plant (Jensen *et al.*, 2012),  
74 similar to sorghum and sugarcane. *M. sinensis* was described as day neutral by Deuter (2000),  
75 whereas Jensen *et al.* (2011) reported that flowering time in *M. sinensis* was more complicated,  
76 depending on multiple factors, including thermal time, temperature, photoperiod, and  
77 precipitation. In the field at Urbana, *M. sacchariflorus* flowers as early as July and as late as

78 early November, whereas *M. sinensis* flowers from late July to mid-October (Gifford *et al.*,  
79 2015; Dong *et al.*, 2018). In sugarcane, floral initiation is induced by a small decrease (30-60 sec  
80 per day) in day length from about 12.5 h (Moore & Nuss, 1987; Berding, 1995). Most sugarcane  
81 varieties need between 12 and 12.5 h of photoperiod to induce flowering (Daniels *et al.*, 1967;  
82 Julien, 1972; Dunkelman, 1977). In our greenhouses at Urbana, Illinois, flowering of diverse  
83 *Miscanthus* accessions typically is greatest from August through October and again from March  
84 through June. For most sugarcane breeding programs in the U.S., peak flowering is in November  
85 and December. In central Illinois, the rapid decrease in day length during the autumn is not  
86 conducive to flowering sugarcane plants in the greenhouse. Thus, it would be desirable to  
87 develop methods to synchronize the flowering time of *Miscanthus* and *Saccharum*, thereby  
88 facilitating the introgression of desirable genes for improving sugarcane. Additionally, it would  
89 be advantageous to be able to better predict and control flowering time in *Miscanthus* so that we  
90 can more readily make crosses between different *Miscanthus* genotypes.

91 In this study, we conducted one set of experiments to explore the feasibility of  
92 synchronizing flowering time of *Saccharum* and *Miscanthus* in a central Illinois (~40° N)  
93 greenhouse, and a complementary experiment in growth chambers to understanding how day  
94 length impacts flowering time and plant growth of *M. sinensis*. The objectives were: 1) to assess  
95 the diversity of flowering time for *Miscanthus* and *Saccharum*, 2) to determine the effects of  
96 cultural treatments that we hypothesized could delay flowering time in *Miscanthus*, 3) to  
97 determine how day length in controlled environment chambers affects flowering time of *M.*  
98 *sinensis* accessions that originate from different latitudes.

99

## 100 **Materials and Methods**

### 101 **Experiment 1: Flowering time management of *Miscanthus* and** 102 **sugarcane in a greenhouse**

103 To determine how to synchronize the flowering of *Miscanthus* and *Saccharum*, a series of  
104 greenhouse experiments were conducted over three years (2014-2017; Expts. 1a-c). A key  
105 component of the study was to assess the diversity of flowering times within each genus, when

106 plants were grown in a greenhouse at Urbana, IL under a photoperiod treatment that was  
107 expected to be conducive to flowering of sugarcane. We also evaluated cultural treatments that  
108 we hypothesized had the potential to delay flowering of *Miscanthus*, such as 4 °C cold storage to  
109 delay the start of growth, cutting plants to 15 cm above the soil surface, and the combination of  
110 cutting followed by one month of 4 °C cold storage.

111 A panel of 23 *Miscanthus* (Table 1) and 31 *Saccharum* accessions (Table 2) were  
112 studied. All plants were grown in a tall (6.1 m eave height), controlled-environment greenhouse  
113 at the University of Illinois Energy Farm at Urbana, IL (40.1° N, 88.2° W), located where there  
114 was no light pollution (e.g. from street lamps or buildings) that could interfere with the short-day  
115 treatment required to flower sugarcane. When natural day length reached 12.5 h in Urbana (14  
116 September in 2014, 2015, 2016), supplemental light (MH 1000W/U/BT37 metal halide bulbs,  
117 Venture Lighting, Twinsburg, OH, US) was provided to decrease the day length by 1 min d<sup>-1</sup>  
118 until a photoperiod of 11 h d<sup>-1</sup> was reached (13 December in 2014, 2015, 2016), at which point  
119 the day length was held constant until exceeded by the natural day length (22 February in 2014,  
120 2015, 2016). Additionally, in the third year experiment (2016-2017), we grew a second set of the  
121 *Miscanthus* genotypes in a greenhouse on the University of Illinois main campus (<5 km from  
122 the Energy Farm greenhouse), in which the plants were given constant 13 h d<sup>-1</sup> photoperiod,  
123 starting on 2 September until natural day length exceeded this value on 9 April. In the  
124 greenhouses, temperature during the day was maintained between 27-31 °C and at night  
125 temperature was between 22-26 °C. *Miscanthus* plants were grown in 7 L pots (T.O. Plastics,  
126 Clearwater, MN, USA) containing peat-based potting mix (Metro-Mix 900, Sun Gro  
127 Horticulture, Agawam, MA, USA), whereas the larger-growing *Saccharum* plants were grown in  
128 17 L pots. Slow release fertilizer was applied to each pot (Osmocote Pro 17-5-11, 6 months; 35 g  
129 per 7 L pot and 140 g per 17 L pot; ICL Specialty Fertilizers, Dublin, OH, USA). Drip irrigation  
130 was supplied to each pot automatically twice per day. For each pot of *Miscanthus* and  
131 *Saccharum* studied, data was recorded weekly when a plant was actively flowering (newly  
132 opened florets dehiscing pollen).

133 The 2014-2015 greenhouse experiment (Expt. 1a) was initiated from 25 March to 21  
134 April 2014. For each of 23 *Saccharum* genotypes, 1-8 pots were established from stem cuttings  
135 (Table 2). For each of 10 *Miscanthus* genotypes, 36 pots were established from divisions of

136 greenhouse-grown stock plants (cut 15 cm above the soil surface; Table 1). Six pots of each  
137 *Miscanthus* genotype were randomly selected as controls and no additional treatments to alter  
138 flowering time were applied to these. On 5 September 2014, six pots of each *Miscanthus*  
139 genotype were cut 15 cm above the soil surface; three of these pots were left in the greenhouse to  
140 regrow (cut treatment), and the other three pots were moved to a 4 °C cold room for four weeks  
141 then returned to the same greenhouse to regrow (cut plus cold treatment). The cut and cut plus  
142 cold treatments were applied to a new set of *Miscanthus* pots every 4 weeks for a total of five  
143 consecutive months (i.e. through 26 December 2014). Data on flowering time was recorded  
144 weekly from 22 Aug 2014 to 30 April 2015.

145         The 2015-2016 greenhouse experiment (Expt. 1b) was initiated on 2-3 June 2015. For  
146 each of 15 *Saccharum* genotypes, from 1-6 pots were established via stem cuttings (Table 2). In  
147 addition to the 10 *Miscanthus* genotypes used in previous year's experiment, 13 additional *M.*  
148 *sacchariflorus* genotypes were included, for a total of 23 *Miscanthus* genotypes in this year's  
149 experiment (Table 1). For each of the 23 *Miscanthus* genotypes, three control pots were  
150 established from divisions of greenhouse-grown stock plants (cut 15 cm above the soil surface;  
151 Table 1). Additionally, for 15 *M. sacchariflorus* of the 23 *Miscanthus* genotypes, eight dormant  
152 divisions (quarters of pots) and bare-root rhizomes pieces (5-10 cm long, wrapped in moist paper  
153 and placed in sealed plastic bags) were stored at 4 °C in the previous autumn (2014) and used to  
154 establish new pots in the greenhouse in a time series during the 2015 growing season (Table 1).  
155 Every 4 weeks from 3 June to 16 September 2015, stored *Miscanthus* genotypes were planted in  
156 the greenhouse for a total of four sets (establishment time points), with two pots per genotype  
157 from stored divisions and three pots from bare-root rhizomes (1-3 rhizomes per pot) for each set.  
158 Data on flowering time was recorded weekly from 1 Aug 2015 to 30 April 2016.

159         The 2016-2017 experiment (Expt. 1c) was initiated on 26-29 July 2016. The 23  
160 *Miscanthus* genotypes were the same as for the previous year's experiment (Table 1). In addition  
161 to the 15 *Saccharum* genotypes used in 2015-2016 experiment, eight new genotypes were  
162 included (Table 2). Control pots for both *Miscanthus* and *Saccharum* were prepared using the  
163 same methods as previous years' experiments. For 15 *M. sacchariflorus* of the 23 *Miscanthus*  
164 genotypes, 18 divisions (quarters of pots) were stored at 4 °C at the time that the control pots  
165 were established in the greenhouse (Table 1). On 6 September, an initial set of six stored



166 divisions per *Miscanthus* genotype were removed from cold storage and three were planted in  
167 the greenhouse running the 1 min d<sup>-1</sup> decreasing photoperiod protocol and another three  
168 divisions were planted in another greenhouse with a constant 13 h d<sup>-1</sup> day length. In total, three  
169 sets of 4 °C *Miscanthus* divisions were planted in each greenhouse at 4-week intervals from  
170 September to November. Data on flowering time was recorded weekly from 1 October 2016 to  
171 30 April 2017.

## 172 **Experiment 2: Effect of day length on flowering time of *M. sinensis*,** 173 ***M. floridulus*, and *M. ×giganteus* ‘1993-1780’ in controlled** 174 **environment chambers**

175 In total, 33 *Miscanthus* genotypes and two *Sorghum bicolor* controls (one short-day and one day-  
176 neutral) were studied (Table 3). The *Miscanthus* genotypes included 25 *M. sinensis* from known  
177 locations in China and Japan, representing latitudes ranging from 19 to 45° N, three ornamental  
178 *M. sinensis* cultivars, two *M. floridulus* from New Guinea and New Caledonia, two diploid *M.*  
179 *×giganteus* (one ornamental cultivar and one natural hybrid), and the leading biomass cultivar  
180 control, the triploid *M. ×giganteus* ‘1993-1780’. The *M. sinensis* genotypes studied here  
181 represent six genetic groups that were previously identified by Clark *et al.* (2014, 2015).  
182 Although detailed source location information for the four ornamental cultivars and the *M.*  
183 *×giganteus* ‘1993-1780’ control is not available, their *M. sinensis* ancestry was previously  
184 shown to be from the Southern Japan genetic group (Table 3; Clark *et al.*, 2014, 2015).

185 Plants were established in 7 L pots in controlled environment chambers under constant  
186 long days (15 h). After 42-61 d of establishment in the chamber, all the aboveground stems of  
187 the *Miscanthus* plants were cut to 5 cm above the soil surface and then subjected to one of three  
188 day length treatments: 15 h, 12.5 h, and 10 h. For each combination of genotype and day length  
189 treatment, three replicate pots were tested. The temperature was a constant 23 °C for the duration  
190 of the experiment. To each pot, 35 g of slow release fertilizer (Osmocote Pro 17-5-11, 6 months;  
191 ICL Specialty Fertilizers, Dublin, OH, USA) was added at planting and after 6 months. Drip  
192 irrigation was provided to each pot.

193 Data were recorded on the number of days to first flagging and first flowering. At the end  
194 of the experiment, data were taken on number of total culms and number of reproductive shoots,

195 number of leaves per culm (~number of nodes), and culm length. An additional trait,  
196 reproductive shoot ratio, was obtained by dividing number of reproductive shoots over the total  
197 culm count. Thus, a total of seven traits were studied. The experiments were ended after at least  
198 80 d with no change in flowering, which was at least 188 d from cutting for the 10 h and 12.5 h  
199 treatments and 352 d for the 15 h treatment.

## 200 **Statistical analysis**

201 For Experiment 1, analyses of variance (ANOVAs) were conducted to assess the effects on  
202 *Miscanthus* flowering time of the treatments performed in each year. For the 2014-2015  
203 experiment, the treatments included cut, and cut plus cold performed monthly from September to  
204 January and controls. For the 2015-2016 experiment, the treatments were plantings of pot  
205 divisions or rhizomes from cold storage, performed monthly from June to September, and  
206 controls. For the 2016-2017 experiment, the treatments were plantings of cold storage pot  
207 divisions from September to November, grown under two different day lengths, and controls.  
208 ANOVAs were conducted with SAS Procedure MIXED (SAS Institute Inc., Cary, NC, USA) for  
209 each year's experiment based on the subset of *Miscanthus* genotypes that flowered following the  
210 model:

$$211 \quad Y_{ijkl} = \mu + T_i + G_j + M_k + TG_{ij} + GM_{jk} + TM_{ik} + TGM_{ijk} + R_l + \varepsilon_{ijkl},$$

212 where  $Y$  is first flowering time,  $T$  represents treatment,  $G$  equals genotype,  $M$  represents month,  
213  $R$  represents replication, and  $TG$ ,  $GM$ ,  $TM$ ,  $TGM$  represent respective interactions of  
214 aforementioned model terms, and  $\varepsilon$  is error. Treatment, genotype and month were set as fixed  
215 and replication was set as random. To better evaluate flowering time diversity between and  
216 within *Miscanthus* and *Saccharum*, ANOVAs were also conducted in SAS Procedure MIXED to  
217 test the effects on flowering-time of genus (*Miscanthus*, *Saccharum*), and genotype nested within  
218 genus as fixed effects, for the subset of genotypes that flowered; for *Miscanthus*, only the control  
219 pots were included in this analysis. Weekly flowering data were plotted in R (R Core Team,  
220 2013) for visualization. Association between the latitude of origin for the *Miscanthus* genotypes  
221 and flowering time was also evaluated by linear regression using R  $lm$  function (R Core Team,  
222 2013).

223 For Experiment 2, ANOVAs were conducted with SAS Procedure MIXED to assess the  
224 fixed effects of genotype, day length (10 h, 12.5 h, and 15 h) and their interactions on flowering



225 traits (days to first flagging and first flowering) and morphological traits (culm length, number of  
226 leaves per culm, number of total culms, number of reproductive shoots and reproductive shoot  
227 ratio). Tukey's HSD test ( $\alpha = 0.05$ ) was estimated to investigate differences among three day  
228 lengths for each trait. The relationships between location of origin (*i.e.* collection site), the  
229 genetic groups to which the genotypes belong, and the phenotypic traits observed in the  
230 controlled-environment chambers under three day lengths were visualized in ArcGIS (ESRI,  
231 2011) by plotting on a geographical map the location of each genotype, color coded by its  
232 previously ascertained *M. sinensis* genetic group (Clark *et al.*, 2014, 2015), along with the  
233 associated phenotypic data from this study (as bar charts with standard errors). Associations  
234 between the latitude of origin and phenotype at the different day lengths were also evaluated by  
235 linear regression using R *lm* function (R Core Team, 2013).

236

## 237 **Results**

### 238 **Experiment 1: Flowering time management of *Miscanthus* and** 239 **sugarcane in a greenhouse**

#### 240 **Key findings over the three years**

241 Large and highly significant differences in flowering time were observed between *Saccharum*  
242 and *Miscanthus*, and among genotypes within each genus (Fig 1; Table 4). As expected  
243 *Saccharum* genotypes typically flowered later than *Miscanthus* genotypes. However, some  
244 *Saccharum* and *Miscanthus* genotypes overlapped in flowering time each year the experiment  
245 was conducted (Fig 1). Each year, the experiment was initiated ~2 months later in the season  
246 than the prior year (Expt. 1a, 25 March to 21 April 2014; Expt. 1b, 2-3 June 2015; and Expt. 1c,  
247 26-29 July 2016) and this appeared to have had a large effect on which genotypes in each genus  
248 flowered, and it also affected the timing of flowering for the *Saccharum* genotypes (Fig 1). Early  
249 planting promoted flowering in both genera and early flowering in *Saccharum*. Over the three  
250 years, *Saccharum* genotypes were observed to flower from October to April, with flowering  
251 obtained for 13/23 genotypes in 2014-2015, 5/15 in 2015-2016, and 7/23 in 2016-2017 (Fig 1,  
252 S1-3 Tables). For *Miscanthus* genotypes, flowering of the control pots was observed from

253 August to April, with flowering obtained for 10/10 genotypes in 2014-2015, 22/23 in 2015-2016,  
254 and only 8/23 in 2016-2017 (Fig 1, S1-3 Tables). In each year, there was a strong negative  
255 correlation between flowering time of the *Miscanthus* genotypes and their latitude of origin ( $r^2 =$   
256 0.89-0.90,  $p < 0.001$ ; Fig 2). Thus, under the short days provided, *Miscanthus* genotypes that  
257 originated from low latitudes were primarily the ones that overlapped in flowering time with  
258 *Saccharum* genotypes (Figs 1 and 2).

259 Some *Miscanthus* and *Saccharum* genotypes flowered consistently over the three years  
260 that the experiment was conducted, irrespective of the differences in initial planting date. Four  
261 sugarcane genotypes ('US84-1058', 'L09-105', 'Ho06-9001', 'Ho06-9002') and the intergeneric  
262 hybrid (*S. arundinaceum* × *Miscanthus*) 'Purple People Greeter' flowered during each of the  
263 three years that Expt. 1 was conducted (Fig 1). Two additional sugarcane genotypes, 'L79-1002'  
264 and 'Ho91-552' flowered in two out of the three years. For *Miscanthus*, control pots for eight of  
265 the 10 genotypes tested in the 2014-2015 experiment also flowered in 2015-2016 experiment.  
266 However, of the 23 *Miscanthus* genotypes tested in both the 2015-2016 and 2016-2017  
267 experiments, only eight genotypes had control pots that flowered in both years (Fig 1, S2 and S3  
268 Tables).

### 269 **Experiment 1a (2014-2015)**

270 In the 2014-2015 greenhouse experiment, more than half of the tested *Saccharum* genotypes  
271 flowered, and this was a substantially larger percentage than that observed in the subsequent  
272 years' experiments in which the stem cuttings were planted later. Moreover, the seven  
273 *Saccharum* genotypes that flowered in multiple years flowered earliest in the 2014-2015  
274 experiment. Four of the *Saccharum* genotypes flowered twice during the 2014-2015 experiment,  
275 once in the late autumn or early winter and a second time in mid-winter or spring (Fig 1). In  
276 contrast, none of the *Saccharum* genotypes flowered twice in the subsequent experiments. The  
277 first flowering flush was observed from October 2014 to January 2015, with *S. spontaneum*  
278 'Saudi Arabia' being the first to flower on 3 October 2014 and *S. hybr.* 'HoCP96-540' being the  
279 last on 13 December 2014 (Fig 1, S1 Table). One *Saccharum* hybrid, 'Ho91-552', flowered a  
280 second time in January 2015 and three *Saccharum* hybrids, 'L09-105', 'L79-1002' and 'Ho06-  
281 9002', had second flush of flowering in April 2015 (Fig 1).

282 For *Miscanthus*, the control pots of the 2014-2015 experiment flowered only from  
283 August through December (Fig 1, S1 Table). The earliest flowering genotype was the  
284 northernmost *M. sinensis* ‘PMS-436’ (41.3° N; first flowering date: 20 August 2014), and the  
285 latest flowering genotype was the southernmost *M. sinensis* ‘PMS-375’ (19.6° N; first flowering  
286 date: 27 November 2014). Notably, the cut treatment and the cut plus cold treatment extended  
287 the flowering time into the late winter and spring for four of the *Miscanthus* genotypes (*M.*  
288 *sacchariflorus* 4x ‘PF30153’, *M. sacchariflorus* ssp. *lutarioriparius* ‘PF30022’, *M. floridulus*  
289 ‘US56-002-03’, and *M. sinensis* ‘PMS-375’). The treatments in September, December, and  
290 January resulted in *Miscanthus* plants that flowered, but the treatments in October and November  
291 did not produce any flowering plants (Fig 1, S1 Table). ANOVA indicated that genotype,  
292 treatment, month of treatment application, and interactions all had significant effects on days to  
293 first flowering (Table 5). Among the four genotypes that flowered after treatments, two tropical  
294 genotypes, *M. floridulus* ‘US56-0022-03’ (20.9° S) and *M. sinensis* ‘PMS-375’ (19.6° N),  
295 flowered only after the cut treatment rather than the cut plus cold treatment, whereas the other  
296 two genotypes *M. sacchariflorus* 4x ‘PF30153’ and *M. sacchariflorus* ssp. *lutarioriparius*  
297 ‘PF30022’ flowered after the cut plus cold treatment only or under both treatments. The January  
298 cut plus cold treatment for *M. sacchariflorus* 4x ‘PF30153’ and *M. sacchariflorus* ssp.  
299 *lutarioriparius* ‘PF30022’, and the January cut treatment for *M. floridulus* ‘US56-0022-03’ and  
300 *M. sinensis* ‘PMS-375’ resulted in plants that flowered in April 2015, which overlapped with the  
301 second flowering of *Saccharum* hybrids, ‘L09-105’, ‘L79-1002’ and ‘Ho06-9002’ (Fig 1).

### 302 **Experiment 1b (2015-2016)**

303 Four *Saccharum* genotypes, including ‘US84-1058’, ‘L09-105’, ‘Ho06-9001’, and ‘Ho06-9002’,  
304 flowered from November 2015 to January 2016 (Fig 1, S2 Table). The intergeneric hybrid (*S.*  
305 *arundinaceum* × *Miscanthus*) ‘Purple People Greeter’ also flowered in early March. For  
306 *Miscanthus*, 22 of the 23 genotypes flowered. Flowering time of the *Miscanthus* controls ranged  
307 from 1 August 2015 to 15 December 2015. The earliest *Miscanthus* genotypes were *M.*  
308 *sacchariflorus* from eastern Russia (47.2-49.1° N), including ‘RU2012-037’, ‘RU2012-050’,  
309 ‘RU2012-016’, ‘RU2012-120’, and ‘RU2012-112’, which flowered in August 2015. In contrast,  
310 the two southernmost genotypes, *M. floridulus* ‘US56-002-03’ and *M. sinensis* ‘PMS-375’  
311 flowered latest in mid-December, similar to that observed in the 2014-2015 experiment. Thus,

312 the *Miscanthus* and *Saccharum* genotypes that were best synchronized in flowering time were *M.*  
313 *floridulus* ‘US56-0022-03’, *M. sinensis* ‘PMS-375’ and *S. hybr.* ‘L09-105’, which all flowered  
314 from mid- to late December (Fig 1, S2 Table).

315 *Miscanthus* pot divisions and rhizomes that were stored at 4 °C then planted in the  
316 greenhouse during June or July flowered in high frequency, but few or no genotypes flowered  
317 when cold-stored materials were planted in August or September, again demonstrating that date  
318 of establishment had a large effect on presence or absence of flowering (Fig 1, S2 Table).  
319 However, flowering time of the cold-stored *Miscanthus* divisions and rhizomes was similar to  
320 that of the controls. ANOVAs indicated that all tested model terms had significant effects except  
321 for treatment by month interaction and genotype by treatment by month interaction (Table 5). Of  
322 the 15 *M. sacchariflorus* genotypes included in the treatments, 11 flowered from stored pot  
323 divisions (seven each from June and July plantings but only one from August and zero from  
324 September; S2 Table), and all flowered when pots were newly established from rhizomes (15  
325 from June, 12 from July, one from August, and zero from September; S2 Table).

### 326 **Experiment 1c (2016-2017)**

327 Six *Saccharum* genotypes, including ‘L09-105’, ‘Ho91-552’, ‘US84-1058’, ‘Ho06-9001’,  
328 ‘Ho06-9002’, and ‘L79-1002’ flowered from December 2016 to March 2017, though with a gap  
329 from mid-January through all of February (Fig 1, S3 Table). In addition, the intergeneric hybrid  
330 (*S. arundinaceum* × *Miscanthus*) ‘Purple People Greeter’ also flowered in early April. The  
331 *Saccharum* genotypes that flowered in the 2016-2017 experiment included all of the genotypes  
332 that flowered in 2015-2016 plus two (‘L79-1002’ and ‘Ho91-552’), but in the 2016-2017  
333 experiment, they flowered later in the season, consistent with the later planting of this trial.

334 For the *Miscanthus*, only 10 of the 23 genotypes flowered, and of these, two flowered  
335 only after cold-stored divisions were planted in September or October (Fig 1, S3 Table).  
336 However, of the 15 *Miscanthus* genotypes included in the cold storage treatments, only four  
337 flowered (Fig 1, S3 Table). An ANOVA of just the four entries that flowered to evaluate effects  
338 of genotype, two day length treatments, month and their interactions on days to first flowering,  
339 detected significant effects of genotype and day length (Table 5). The September planting of  
340 three *M. sacchariflorus* genotypes, ‘RU2012-037’, ‘RU2012-078’, and ‘Tohoku-2010-025’,

341 flowered at the end of October 2016 under the 1 min d<sup>-1</sup> decreasing length. Under the 13 h  
342 constant day length, the September planting of ‘Tohoku-2010-025’ and the October planting of  
343 ‘RU2012-037’, ‘RU2012-050’, and ‘RU2012-078’ flowered in early December 2016. None of  
344 the November plantings of cold-stored divisions flowered. Thus, the control pots of *M. floridulus*  
345 ‘US56-0022-03’ and the October plantings of *M. sacchariflorus* ‘RU2012-050’ and ‘RU2012-  
346 078’ synchronized in flowering time with *S. hybr.* ‘L09-105’ during early December 2016.

## 347 **Experiment 2: Effect of day length on flowering time of *M. sinensis*,** 348 ***M. floridulus*, and *M. ×giganteus* ‘1993-1780’ in controlled** 349 **environment chambers**

350 ANOVAs indicated that genotype, day length, and genotype by day length interactions had  
351 significant effects on each of the seven flowering and morphological traits (Table 6). All 35  
352 entries (including 33 *Miscanthus* and two *S. bicolor* controls) flowered under one or more of the  
353 tested day lengths (10, 12.5, and 15 h). However, only five mostly subtropical *M. sinensis*  
354 genotypes (‘Koike-21c’, 32.2° N; ‘Miyazaki’, 31.8° N; ‘PMS-226’, 26.6° N; ‘PMS-347’, 24.2°  
355 N; ‘PMS-359’, 22.9° N), one ornamental cultivar (‘Nippon’), and the biomass control M×g  
356 ‘1993-1780’ flowered under each of the tested day lengths, and these genotypes behaved  
357 similarly to the short-day *S. bicolor* control ‘100M’ (Ma<sub>1</sub>Ma<sub>2</sub>Ma<sub>3</sub>Ma<sub>4</sub>; Lee *et al.*, 1998; Miller *et*  
358 *al.*, 1999), with flowering earliest at 10 h, intermediate at 12.5 h, and latest at 15 h (Fig 3, Table  
359 3). Similarly, for the *Miscanthus* genotypes that flowered under 10 h and 12.5 h, average days to  
360 first flower (64 and 90 d, respectively; Table 3) were earlier than those that flowered at 15 h (151  
361 d), though the difference between 10 h and 12.5 h was not significant at  $\alpha=0.05$  based on  
362 Tukey’s HSD test (Fig 3). The day-neutral *S. bicolor* control ‘38M’ (ma<sub>1</sub>ma<sub>2</sub>ma<sub>3</sub><sup>R</sup>Ma<sub>4</sub>; Lee *et al.*,  
363 1998; Miller *et al.*, 1999) flowered quickly and at about the same time regardless of day length  
364 (50 to 60 days after cutting), as expected; however, none of the *Miscanthus* genotypes behaved  
365 similarly (Fig 3, Table 3).

366 Of the 33 *Miscanthus* genotypes, all but three tropical accessions flowered under the 15 h  
367 day length (Fig 3, Table 3), and the highest ratio of reproductive shoots to total number of culms  
368 was typically observed for 15 h days (Fig 4B, S4 Table). With the 15 h day length, days to first  
369 flower for the *M. sinensis* genotypes ranged from 66 d to 360 d (Table 3). However, of the five

370 *Miscanthus* genotypes (‘PMS-359’, ‘PMS-375’, ‘PMS-382’, ‘NG77-022’, ‘US56-0022-03’) that  
371 originated from the tropics (23.5° S to 23.5° N), only two flowered under 15 h days, but each  
372 flowered under 12.5 h days, and one (*M. floridulus* ‘US56-0022-03’, 20.9° S) flowered only  
373 under 12.5 h days (Fig 3, Table 3). Similarly, for four of the five tropical *Miscanthus* genotypes,  
374 reproductive shoot ratio was highest under 12.5 h days, in contrast to those that originated at  
375 higher latitudes (Fig 4B, S4 Table).

376 At 10 h day length, there was a strong negative correlation between the latitude of origin  
377 and days to first flower ( $r^2 = 0.88$ ), but at 12.5 and 15 h, the correlations were only moderately  
378 negative (Fig 3). However, none of the 12 *M. sinensis* genotypes that originated from latitudes  
379 exceeding 34° N flowered under 10 h days, and only one (‘EBI-2008-051c’) of these flowered  
380 under 12.5 h days, yet all flowered under 15 h days (Fig 3, Table 3). Notably, six of these  
381 northern (i.e. temperate) *M. sinensis* genotypes flagged under 10 h and/or 12.5 h day lengths but  
382 did not proceed to flower (Fig 3; ‘PMS-130’, ‘PMS-159’, ‘PMS-161’, ‘PMS-438’, ‘Tohoku-  
383 2010-015a’, and ‘Koike-11a’). Some subtropical *M. sinensis* genotypes also only flowered under  
384 15 h days (e.g. ‘PMS-314’, ‘Onna-1a’, and ‘Uruma-1b’), yet others flowered under 12.5 and 15  
385 h days or all three tested day lengths, indicating that the subtropics is a transition zone with a  
386 mixture of day length response types (Fig 3). Moreover, in addition to not flowering under short  
387 days, the northern *M. sinensis* genotypes responded to 10 and 12.5 h days by producing very  
388 short culms, with the shortest days resulting in the shortest culms (Figs 5 and 6, S4 Table).

389 Culm length of the *M. sinensis* and *M. floridulus* genotypes was strongly and negatively  
390 correlated with latitude of origin under 10 h days ( $r^2 = 0.81$ ) and 12.5 h days ( $r^2 = 0.63$ ), but the  
391 relationship was weak under 15 h days ( $r^2 = 0.09$ ; Fig 5A). Among all 33 *Miscanthus* genotypes,  
392 Tukey’s HSD test ( $\alpha = 0.05$ ) indicated that culm length was significantly different across three  
393 day length treatments. Nearly all the *Miscanthus* entries achieved maximal culm length under the  
394 15 h treatment (including the biomass cultivar M×g ‘1993-1780’), but the nearer to the equator  
395 an accession originated, the less of a difference in culm length between the short day treatments  
396 and the 15 h day treatment (Fig 5A). For example, *M. floridulus* ‘NG77-022’ from 3.6° S  
397 produced similarly long culms under all three day lengths (Figs 5A and S1, S4 Table). Two  
398 tropical genotypes (‘PMS-382’ and ‘US56-0022-03’), two subtropical genotypes (‘PMS-226’



399 and ‘Miyazaki’) and one ornamental cultivar (‘Cabaret’) were tallest under 12.5 h days (Fig 5A,  
400 S4 Table).

401 *M. sinensis* genotypes that originated from high latitudes in Japan had greater numbers of  
402 leaves at 15 h than at 10 h day lengths (Fig 5B, S4 Table). In contrast, *M. sinensis* genotypes that  
403 originated from high latitudes on mainland Asia (Korea/North China and Yangtze-Qinling  
404 genetic groups) had the same or greater numbers of leaves at 10 h in comparison to 15 h (Fig 5B,  
405 S4 Table). Thus, for the Japanese accessions, the short culms observed for high-latitude  
406 accessions of *M. sinensis* under short days was achieved substantially by greater phyllochron  
407 under short days than under long days, whereas for the mainland accessions, short culms were  
408 obtained primarily via short internodes rather than by more days needed to develop a leaf. Like  
409 the northern Japanese *M. sinensis* genotypes, most of the subtropical and tropical accessions of  
410 *M. sinensis* produced more leaves under long days than under short days. However, some  
411 accessions produced similar numbers of leaves under all three day lengths tested (e.g. ‘PMS-  
412 306’, 29.9° N), and other entries, such as *M. floridulus* ‘NG77-022’ (3.6° S) and the biomass  
413 control cultivar M×g ‘1993-1780’ produced more leaves under shorter days than longer days  
414 (Fig 5B, S4 Table).

415 Total number of culms for most of the *Miscanthus* genotypes was ~3-13 fold greater  
416 under 10 h than 15 h days, with intermediate numbers of culms typically resulting from 12.5 h  
417 days (Fig 4A, S4 Table). However, the two tropical *M. floridulus* (‘NG77-022’ and ‘US56-0022-  
418 03’), four *M. sinensis* (‘Flamingo’, ‘Koike-21c’, ‘Miyazaki’, and ‘Tohoku-2010-015a’), and the  
419 biomass control M×g ‘1993-1780’ produced the greatest number of culms at 12.5 h. Thus, under  
420 10 and 12.5 h day lengths, most of the *M. sinensis* genotypes from low latitudes produced a large  
421 number of tall culms, many of which flowered, whereas genotypes from high latitudes produced  
422 a large number of short culms that did not flower (Figs 4-6, S1 and S2 Figs).

## 423 **Discussion**

### 424 **Flowering sugarcane at 40° N**

425 Flowering was accomplished for more than half of the sugarcane genotypes in this study, in  
426 central Illinois, by growing the plants in a warm greenhouse and providing a declining

427 photoperiod of 1 min d<sup>-1</sup> from 12.5 h to 11 h over the course of 3 months, then holding a constant  
428 11 h day length for an additional ~2 months. Sugarcane is difficult to flower and synchronize for  
429 crosses, so sugarcane breeders commonly use photoperiod facilities to induce flowering by an  
430 initial exposure to ~12.5 days followed by a declining day length of 30-60 sec d<sup>-1</sup> (Moore &  
431 Nuss, 1987; Berding, 1995; Bischoff & Gravois, 2004; Cheavegatti-Gianotto *et al.*, 2011).  
432 Further improvements in the number of genotypes that can be flowered in our greenhouse might  
433 be obtained by adjusting the rate of decline in photoperiod. Recently, two studies found that a  
434 photoperiod decline of 40-45 sec d<sup>-1</sup> was likely superior to 30 or 60 d<sup>-1</sup> for flowering most  
435 sugarcane genotypes (Berding *et al.*, 2010; Melloni *et al.*, 2015).

436         The early establishment of the sugarcane pots in Expt. 1a relative to Expts. 1b and 1c was  
437 advantageous, resulting in more than twice as many genotypes flowering in autumn and early  
438 winter, and also enabling a second flush of flowering for some genotypes in late winter and  
439 spring that was not obtained in the later-planted experiments. Julian *et al.* (1974) and Berding  
440 (1995) observed that the optimal age of sugarcane stems for floral induction was 12-16 weeks. In  
441 our study, when the critical 12.5 h photoperiod was reached in mid-September, the age of the  
442 sugarcanes was ~20 weeks for Expt. 1a, ~14 weeks for Expt. 1b, and 6 weeks for Expt. 1c. Thus,  
443 under our conditions, an establishment phase about six weeks longer than the ~14 weeks  
444 optimum previously reported was beneficial. Though the later planting of sugarcane in Expts. 1b  
445 and 1c helped limit height, thereby avoiding stems reaching the roof of a greenhouse with 6.1 m  
446 side-walls, the height problem could be better addressed by air layering stems so that they could  
447 be cut if they get too tall, without sacrificing growth. Air layering would also make it easier for  
448 workers to move stems during flowering to facilitate emasculation and crossing.

449         Species and genotype also had a large effect on timing and ease of flowering of  
450 sugarcane in our study. The earliest flowering species were *S. spontaneum* and *S. arundinaceum*,  
451 which was expected (Tagane *et al.*, 2011). *Saccharum* hybrids with a high proportion ancestry  
452 from *S. spontaneum*, such as ‘L79-1002’, ‘Ho06-9001’, and ‘Ho06-9002’, were among the most  
453 consistent to flower in our study. However, some commercial sugarcane materials, such as ‘L09-  
454 105’, also flowered well in our study.

## 455 **Effects of day length on *Miscanthus* development**

456 Photoperiod profoundly affected all aspects of *Miscanthus* growth and development that we  
457 studied, especially flowering. Expt. 2 demonstrated that few *M. sinensis* or *M. floridulus*  
458 genotypes that originated outside of the tropics flowered well under 12.5 h days or less, yet all  
459 the subtropical and temperate-sourced genotypes flowered well under 15 h days (Fig 3), which is  
460 the photoperiod during the summer solstice at 40° N, where Urbana is located. Jensen *et al.*  
461 (2012) concluded that *M. sacchariflorus* is a quantitative short-day plant because flowering  
462 under a constant 12.5 h or a declining photoperiod mimicking 34.1° N was >50 days earlier than  
463 for those grown under constant 15.3 h days, which was generally consistent with our  
464 observations for *M. sinensis* in Expt. 2, though critical photoperiods may vary by species and  
465 genotype. For *M. sacchariflorus* grown under a declining photoperiod mimicking 34.1° N,  
466 Jensen *et al.* (2012) estimated that floral induction occurred between 13.8 and 12.5 h day  
467 lengths.

468 Notably, Jensen *et al.* (2012) also observed that *M. sacchariflorus* genotypes originating  
469 from 34.5° N and higher failed to flower under a declining photoperiod mimicking 34.1° N, even  
470 though some produced flag leaves when day lengths were between 12.7 and 12.1 h; in contrast,  
471 *M. sacchariflorus* genotypes from lower latitudes flowered when days were shorter than 12 h.  
472 For *M. sinensis*, we similarly observed that flowering of genotypes from temperate latitudes  
473 (>34° N) was inhibited by short days (constant 10 and 12.5 h), even though some produced flag  
474 leaves, whereas flowering was consistently strong under 15 h days. In addition to not flowering,  
475 *M. sinensis* from temperate latitudes produced many short culms under 10 and 12.5 h days,  
476 resulting in a short and dense morphology similar to that of many alpine plants (Figs 5 and 6, S1  
477 and S2 Figs). Such a dense and short morphology can protect apical meristems from freeze  
478 damage by keeping them below the soil surface, and limit water loss by reducing air flow around  
479 leaves. Thus, for *Miscanthus*, relatively short days can accelerate floral induction, but below a  
480 critical threshold, especially for genotypes adapted to high latitudes, short days can signal that  
481 plants should prepare for winter, and importantly this response is epistatic to flowering.  
482 Similarly, short-days (<12.5 h) have been shown to induce dormancy and reduce or prevent  
483 flowering in switchgrass (*Panicum virgatum*) and big bluestem (*Andropogon gerardii*)  
484 (especially for high-latitude populations), which are also quantitative short-day, perennial, C<sub>4</sub>  
485 grasses (Benedict, 1940; McMillan, 1959; Castro *et al.*, 2011). Moreover, low-intensity light

486 extension of day length prevented or reversed this dormancy in switchgrass (Van Esbroeck *et al.*,  
487 2004).

488 In the greenhouse experiment (Expt. 1), we established *Miscanthus* plants at different  
489 times (implemented by different initial planting dates, by cutting back established plants, or by  
490 cutting back plants then storing them at 4 °C for 1 month to mimic dormancy) in an effort to  
491 identify treatments that could delay flowering sufficiently to synchronize with sugarcane, but  
492 time of establishment was only effective if day length was conducive. Establishing *Miscanthus*  
493 plants from March through the first week of July enabled genotypes from subtropical and  
494 temperate latitudes to flower in late summer and early autumn (Fig 1; Expts. 1a and 1b),  
495 indicating that floral induction occurred during photoperiods greater than 12.5 h, prior to mid-  
496 September, which was consistent with the results of Expt. 2 and Jensen *et al.* (2012). Moreover,  
497 there was little difference in flowering time between plants of the same genotype established in  
498 June compared to those established in early July (Fig 1; Expt. 1b), indicating that more rapid  
499 flowering associated with the shorter photoperiods encountered by mature stems of the later  
500 planting compensated for the difference in planting date. Thus, when established in spring and  
501 early summer, the *Miscanthus* genotypes from subtropical and temperate latitudes flowered early  
502 and failed to synchronize with most of the sugarcane genotypes, though some overlap was  
503 achieved with the early-flowering *S. spontaneum* and *S. arundinaceum* accessions. With early-  
504 season establishment and under the declining photoperiod treatment during autumn in the  
505 greenhouse, only the two tropical *Miscanthus* genotypes tested (*M. floridulus* ‘US56-002-03’  
506 and *M. sinensis* ‘PMS-375’) flowered late enough to consistently synchronize flowering with the  
507 first flush of sugarcane flowering in Expt. 1a (in late November and early December) and the  
508 single flush of sugarcane flowering in Expts. 1b and 1c (Fig 1), which was consistent with the  
509 results of Expt. 2 that these low-latitude genotypes flowered strongly under constant 12.5 h days  
510 but did not flower under 15 days (Fig 3). When *Miscanthus* genotypes from subtropical and  
511 temperate latitudes were established during the last week of July or later in the summer or  
512 autumn, few flowered because the photoperiod was too short to be conducive by the time stems  
513 had sufficiently matured; the exceptions were primarily *M. sacchariflorus* genotypes, and the  
514 tropical *M. floridulus* ‘US56-002-03’ and *M. sinensis* ‘PMS-375’ (Fig 1; Expts. 1a-c). For  
515 example, when some *M. sacchariflorus* genotypes were established during the first week of

516 September, flowering was delayed until November, which would allow synchronization with  
517 many sugarcane genotypes (Fig 1; Expt. 1c).

518 **Synchronizing flowering time of sugarcane and *Miscanthus* to**  
519 **facilitate intergeneric crosses**

520 To synchronize flowering of sugarcane and *Miscanthus* in the autumn, it would be advantageous  
521 to hasten flowering of the sugarcane and delay flowering of the *Miscanthus*. Furthermore, it  
522 would be desirable to promote flowering of both genera during the late winter and spring. To  
523 achieve strong flowering of sugarcane, in a high-latitude greenhouse such as ours, during autumn  
524 and early winter, and promote flowering in spring, the plants should be established from cuttings  
525 five to six months prior to onset of the 12.5 h and declining day lengths critical for floral  
526 induction.

527 For *Miscanthus* that originated from the tropics, the same environment that is conducive  
528 to flowering of sugarcane, including declining photoperiod, will likely result in synchronized  
529 flowering between the two genera during the late autumn. Moreover, cutting back established  
530 plants of tropical *Miscanthus* genotypes in early September, December or January can be used to  
531 delay flowering and synchronize with a second spring flush of sugarcane flowering. We note,  
532 however, that cold treatments after cutting were disadvantageous for flowering tropical  
533 *Miscanthus* genotypes.

534 For *M. sinensis* genotypes that originated from subtropical and temperate latitudes,  
535 however, the short and declining day lengths needed to flower sugarcane are not conducive to  
536 synchronization of flowering between the two genera. One strategy for synchronizing the  
537 flowering of subtropical and temperate *M. sinensis* is to grow the plants under a conducive  
538 photoperiod, such as constant 15 h days (in controlled environment chambers or in a different  
539 greenhouse than that used to grow the sugarcanes) and use empirical data on the number of  
540 growing days needed to obtain first or peak flowering (e.g. S1-3 Tables) to choose a planting  
541 date that would achieve concurrent flowering with sugarcane in late autumn and early winter or  
542 in spring. Though data from Expt. 2 indicated that a constant 15 h day length should facilitate  
543 strong flowering after a defined number of days for most if not all subtropical and temperate *M.*  
544 *sinensis*, it may not be the fastest or optimal day length. Given that 12.5 h days was observed to

545 be too short, an optimal day length for flowering subtropical and temperate *M. sinensis* may be  
546 between 13 and 15 h, though further testing would be needed to determine this. Moreover,  
547 Castro *et al.* (2011) found that providing switchgrass, a cumulative short-day plant, with 24 h  
548 photoperiod, resulted in multiple rounds of flowering and this could be used to synchronize  
549 flowering between early and late genotypes. Given these promising results from switchgrass and  
550 the high level of flowering observed under ~15 h days in *M. sinensis* (Expt. 2) and *M.*  
551 *sacchariflorus* (Jensen *et al.*, 2012), it would be worthwhile to investigate if a 24 h photoperiod  
552 would also produce sequential flowering in *Miscanthus*.

553 For *M. sacchariflorus* grown under the short and declining photoperiod needed to flower  
554 sugarcane, most genotypes flowered as late as the end of October, which was still too early to  
555 synchronize with most sugarcane genotypes. However, *M. sacchariflorus* ssp. *lutarioriparius*  
556 ‘PF30022’ was a notable exception, in that plants given a cut plus 1 month cold treatment in  
557 September, December or January then grown under the short and declining day length regime  
558 that was conducive to flowering sugarcane, produced flowers in late November or March/April,  
559 which would match well with sugarcane flowering (Fig 1; Expt. 1a). *M. sacchariflorus* ssp.  
560 *lutarioriparius* is indigenous to the lower Yangtze River watershed and is a tall plant with high-  
561 biomass yield that is harvested locally to produce paper on a commercial scale (Liu & Yu, 2004;  
562 Chen & Renvoize, 2005; Sacks *et al.*, 2013), so crossing it to sugarcane would be desirable.  
563 However, to delay flowering of most *M. sacchariflorus* genotypes for synchronization with  
564 sugarcane, we suggest cultivation of the former under a constant conducive photoperiod for an  
565 empirically determined amount of time, similar to the strategy we propose for subtropical and  
566 temperate *M. sinensis*. However, there is currently little information on what might be optimal  
567 photoperiods for flowering *M. sacchariflorus*. Jensen *et al.* (2012) observed that *M.*  
568 *sacchariflorus* flowered under constant 15.3 h days, so that would be one option. We observed  
569 that under constant 13 h days, three out of six *M. sacchariflorus* genotypes from eastern Russia  
570 planted during the first week of October began to flower by early December (Fig 1, Expt. 1c),  
571 which would be suitably late for crossing with sugarcane; however, because these accessions  
572 originated from ~49° N, an optimal day length for flowering them might be expected to be  
573 greater than 13 h. Given that *M. sacchariflorus* originates from a wide range of latitudes, day  
574 lengths that are optimal for flowering might be expected to range from 12.5 to 16 h.



575           In this study, we identified barriers to synchronizing the flowering of sugarcane and  
576 *Miscanthus*, and proposed methods to circumvent these. For a given genotype of *Miscanthus*, a  
577 range of flowering dates may be obtained by staggered plantings grown under a single conducive  
578 constant day length, or by planting on a single date and growing under a range of conducive and  
579 constant day lengths, leveraging the short-day response of faster flowering under shorter day  
580 lengths than longer ones. By controlling flowering time of sugarcane and *Miscanthus*, plant  
581 breeders will be better able to improve these crops via intra- and intergeneric crosses of their  
582 choosing.

## 583 **Acknowledgements**

584 This research was supported by the Energy Biosciences Institute, USDA HATCH project ILLU-  
585 802-311, and the DOE Office of Science, Office of Biological and Environmental Research  
586 (BER), grant nos. DE-SC0016264, and DE-SC0018420 (Center for Advanced Bioenergy and  
587 Bioproducts Innovation).

## 588 **References**

- 589 Benedict HM. Effects of day length and temperature on the flowering and growth of four species  
590 of grasses. *Journal of Agricultural Research*. 1940; 61: 661-671.
- 591 Berding N. Improving flowering of sugarcane for breeding: progress and prospects. *Proceedings*  
592 *of the Australian Society of Sugar Cane Technologists*. 1995; 17: 162-171.
- 593 Berding N. Pursuing higher efficacy for managed photoperiodic initiation of sugarcane flowering  
594 in the tropics. *Proc Aust Soc Sugar Cane Technol*. 2010; 32: 234-250.
- 595 Castro JC, Boe A, Lee DK. A simple system for promoting flowering of upland switchgrass in  
596 the greenhouse. *Crop Science*. 2011; 51: 2607-2614.
- 597 Cheavegatti-Gianotto A, de Abreu HMC, Arruda P, Filho JCB, Burnquist WL, Creste S, et al.  
598 Sugarcane (*Saccharum X officinarum*): A reference study for the regulation of genetically  
599 modified cultivars in Brazil. *Tropical Plant Biology*. 2011; 4: 62-89.
- 600 Chen SL, Renvoize SA. A new species and a new combination of *Miscanthus* (Poaceae) from  
601 China. *Kew Bull*. 2005; 60: 605-607.
- 602 Chen YH, Lo CC. Disease resistance and sugar content in *Saccharum-Miscanthus* hybrids.  
603 Report of the Taiwan Sugar Research Institute. 1988; 120: 1-8.
- 604 Clark LV, Brummer JE, Głowacka K, Hall MC, Heo K, Peng J, et al. A footprint of past climate  
605 change on the diversity and population structure of *Miscanthus sinensis*. *Annals of Botany*.  
606 2014; 114: 97-107.
- 607 Clark LV, Stewart JR, Nishiwaki A, Toma T, Kjeldsen JB, Jørgensen U, et al. Genetic structure  
608 of *Miscanthus sinensis* and *Miscanthus sacchariflorus* in Japan indicates a gradient of  
609 bidirectional but asymmetric introgression. *Journal of Experimental Botany*. 2015; 66: 4213-  
610 4225.
- 611 Creste S, Pinto LR, Xavier MA, de Marcos G, Landell R. The improvement of the germplasm in  
612 developing agro-energetic profile sugarcane cultivars. *Sugarcane Bioethanol*. 2014; 35: 353-  
613 358.
- 614 Daniels J, Glaziou KT, Bull TA. Flowering in *Saccharum spontaneum*. *Proceedings of*  
615 *International Society of Sugar Cane Technologists*. 1967; 12: 1027-1032.
- 616 Deuter M. Breeding approaches to improvement of yield and quality in *Miscanthus* grown in  
617 Europe. In: Lewandowski I, Clifton-Brown JC, editors. *European Miscanthus improvement*  
618 (FAIR3 CT-96-1392) Final Report. Institute of Crop Production and Grassland Research,  
619 University of Hohenheim, Stuttgart, Germany. 2000. pp. 28-52.

- 620 Dong H, Liu S, Clark LV, Sharma S, Gifford JM, Juvik JA, et al. Genetic mapping of biomass  
621 yield in three interconnected *Miscanthus* populations. *GCB Bioenergy*. 2018; 10: 165-185.
- 622 Dunckelman PH. Manipulation of photoperiod for flower control and crossing of *Saccharum*  
623 *officinarum* L. *Proceedings of International Society of Sugar Cane Technologists*. 1977; 6:  
624 14-17.
- 625 ESRI. ArcGIS Desktop: Release 10. Redlands, CA. 2011.
- 626 Gifford JM, Chae WB, Swaminathan K, Moose SP, Juvik JA. Mapping the genome of  
627 *Miscanthus sinensis* for QTL associated with biomass productivity. *GCB Bioenergy*. 2015; 7:  
628 797-810.
- 629 Głowacka K, Ahmed A, Sharma S, Abbott T, Comstock JC, Long SP, et al. Can chilling  
630 tolerance of C<sub>4</sub> photosynthesis in *Miscanthus* be transferred to sugarcane? *GCB Bioenergy*.  
631 2016; 8: 407-418.
- 632 Heaton EA, Flavell RB, Mascia PN, Thomas SR, Dohleman FG, Long SP. Herbaceous energy  
633 crop development: recent progress and future prospects. *Current Opinion in Biotechnology*.  
634 2008; 19: 202-209.
- 635 Jensen E, Farrar K, Thomas-Jones S, Hastings A, Donnison I, Clifton-Brown J. Characterization  
636 of flowering time diversity in *Miscanthus* species. *GCB Bioenergy*. 2011; 3: 387-400.
- 637 Jensen E, Robson P, Norris J, Cookson A, Farrar K, Donnison I, et al. Flowering induction in the  
638 bioenergy grass *Miscanthus sacchariflorus* is a quantitative short-day response, whilst  
639 delayed flowering under long days increase biomass accumulation. *Journal of Experimental*  
640 *Botany*. 2012; 64: 541-552.
- 641 Julian R, Soopramanien GC, Lorence D. Juvenility, senility, climate and flowering in  
642 *Saccharum*. *Proc. Int. Soc. Sugar Cane Technol*. 1974; 15: 984-990.
- 643 Julien MHR. Physiology of flowering in *Saccharum* I. daylength control of floral initiation and  
644 development in *S. spontaneum* L. *Journal of Experimental Botany*. 1972; 24: 549-557.
- 645 Kar S, Zhang N, Nakashima T, Villanueva-Morales A, Stewart JR, Sacks EJ, et al. *Saccharum* ×  
646 *Miscanthus* intergeneric hybrids (miscanes) exhibit greater chilling tolerance of C<sub>4</sub>  
647 photosynthesis and postchilling recovery than sugarcane (*Saccharum* spp. hybrids). *GCB*  
648 *Bioenergy*. 2019; 11: 1318-1333.
- 649 Kar S, Weng TY, Nakashima T, Villanueva-Morales A, Stewart JR, Sacks EJ, et al. Field  
650 performance of *Saccharum* × *Miscanthus* intergeneric hybrids (Miscanes) under cool climatic  
651 conditions of northern Japan. *Bioenergy Research*. 2020; 13: 132-146.
- 652 Krishnamurth M. Further studies on sugarcane pollen. *Proc. Int. Soc. Sugar Cane Technol*. 1980;  
653 17: 1204-1206.

- 654 Lam E, Shine J, Silva J, Lawton M, Bonos S, Calvino M, et al. Improving sugarcane for biofuel:  
655 engineering for an even better feedstock. *GCB Bioenergy*. 2009; 1: 251-255.
- 656 Lee I-J, Foster KR, Morgan PW. Photoperiod control of gibberellin levels and flowering in  
657 Sorghum<sup>1</sup>. *Plant Physiology*. 1998; 116: 1003-1011.
- 658 Liu J, Yu X. The exploitation and utilization of *Triarrhena lutarioriparia* resources. *J Zhongkai*  
659 *Agrotechn Coll*. 2004; 7: 63-67.
- 660 McMillan C. The role of ecotypic variation in the distribution of the central grassland of North  
661 America. *Ecological Monographs*. 1959; 29: 285-308.
- 662 Melloni MLG, Melloni MNG, Scarpari MS, Garcia JC, Landell MGA, Pinto LR (2015)  
663 Flowering of sugarcane genotypes under different artificial photoperiod conditions. *American*  
664 *Journal of Plant Sciences*. 2015; 6: 456-463.
- 665 Miller FR, Dahlberg JA, Morgan PW. Registration of A<sub>3</sub>/B<sub>3</sub> cytoplasmic-genetic male-sterile  
666 sorghum maturity and height parental lines. *Crop Science*. 1999; 39: 306-307.
- 667 Moore PH, Nuss KJ. Flowering and flower synchronization. In: Heinz DJ, editor. *Developments*  
668 *in Crop Science*. Elsevier. 1987. pp. 273-311.
- 669 R Core Team. *R: A language and environment for statistical computing*. 2013.
- 670 Rounsaville TJ, Touchell DH, Ranney TG. Fertility and reproductive pathways in diploid and  
671 triploid *Miscanthus sinensis*. *HortScience*. 2011; 46: 1353-1357.
- 672 Sacks EJ, Juvik JA, Lin Q, Stewart R, Yamada T. The gene pool of *Miscanthus* species and its  
673 improvement. In: Paterson AH, editor. *Genomics of the Saccharinae*. Springer, New York.  
674 2013. pp. 73-101.
- 675 Sartoris GB. Longevity of sugarcane and corn pollen – A method for long-distance shipment of  
676 sugarcane pollen by airplane. *American Journal of Botany*. 1942; 29: 395-400.
- 677 Somerville C, Youngs H, Taylor C, Davis C, Long SP. Feedstocks for lignocellulosic biofuels.  
678 *Science*. 2010; 329: 790-792.
- 679 Tagane S, Terajima Y, Shikina Y, Kyan M, Makiya N, Irei S, et al. Effects of day-length  
680 treatment and harvesting time on the flowering of *Erianthus arundinaceus* on Ishigaki Island,  
681 Japan. *Tropical Agriculture and Development*. 2011; 55: 44-50.
- 682 Van Esbroeck GA, Hussey MA, Sanderson MA. Reversal of dormancy in switchgrass with low-  
683 light photoperiod extension. *Bioresour. Technol*. 2004; 91: 141-144.
- 684 Zhao Y, Jiang J, Liu M, Xin A, Yi Z. Comparison of pollen viability determining methods for  
685 *Miscanthus sinensis* Anderss. *Chinese Agricultural Science Bulletin*. 2009; 25: 147-150.
- 686

## 687 Figure Captions

688 **Fig 1.** *Miscanthus* and *Saccharum* flowering time in a series of greenhouse experiments over  
689 three years. In each year (2014-2016), plants were grown in a greenhouse that provided  
690 decreasing day length of 1 min d<sup>-1</sup> via supplemental light from high intensity discharge (HID)  
691 lamps starting when natural day length reached 12.5 h in Urbana, IL (14 September; red vertical  
692 dashed line) until day length reached 11 h (13 December), then held constant until natural day  
693 length exceeded this value on 22 February. In 2016, an additional set of *Miscanthus* plants were  
694 also grown in a second greenhouse at Urbana, IL, in which day length was held at a constant 13  
695 h via supplemental HID lamps, starting on 2 September until natural day length exceeded this  
696 value on 9 April. The combinations of symbols and colors represent additional cultural  
697 treatments applied to *Miscanthus* pots, as shown in the legend. In 2014 pots of *Miscanthus* and  
698 *Saccharum* were established between 25 March to April 21; *Miscanthus* treatments included 1)  
699 cutting plants ~15 cm above the soil in September, December and January and allowing them to  
700 immediately regrow, 2) cutting the plants and storing them for 1 mo at 4 °C before returning  
701 them to the greenhouse to regrow, and 3) uncut controls. In 2015 all *Saccharum* pots were  
702 established on 2-3 June; *Miscanthus* treatments were 1) stored divisions (planted every 4 wks  
703 starting on 3 June 2015), 2) rhizomes (planted every 4 wks starting on 3 June 2015), and 3)  
704 controls (actively growing plants cut ~15 cm above the soil surface on 3 June). The 2016  
705 experiment was initiated on 26-29 July; control pots of *Miscanthus* cut ~15 cm above the soil  
706 surface were compared with a set of pots stored at 4 °C and returned at 4-wk intervals from  
707 September to November to one greenhouse with 1 min d<sup>-1</sup> decreasing photoperiod and to another  
708 greenhouse with a constant 13 h d<sup>-1</sup> day length. Only genotypes that flowered in at least one of  
709 the experiments are shown. Grey shaded lines indicate that plant materials were not included in  
710 that year's experiment. Over the three years, 23 *Miscanthus* genotypes including *M. sinensis*  
711 (*Msi*), *M. sacchariflorus* (*Msa*), *M. ×giganteus* (*M×g*), and *M. floridulus* (*Mfl*) flowered, and a  
712 total of 12 *Saccharum* accessions including nine commercial sugarcanes (*S. hybr.*), and two *S.*  
713 *spontaneum* (*S. spon.*) flowered. *Saccharum arundinaceum* (*S. arund.*) 'UI11-00040', 'US 71-  
714 0122-01', and the interspecific hybrid (*Saccharum × Miscanthus*) 'Purple People Greeter' also  
715 flowered, though these were grown in a separate greenhouse under natural day length. Flowering  
716 time was recorded weekly from August to April.

717 **Fig 2.** Relationships between absolute value of latitude at collection site (x-axis) and date of first  
718 flowering (y-axis) for *Miscanthus sacchariflorus* (circles) and *M. sinensis* and *M. floridulus*  
719 (diamonds) genotypes when grown in a greenhouse at Urbana, IL that provided decreasing day  
720 length of 1 min d<sup>-1</sup> via supplemental light from high intensity discharge (HID) lamps starting  
721 when natural day length reached 12.5 h (14 September). Experiments were conducted in three  
722 consecutive years: 2014-2015 (green), 2015-2016 (purple), and 2016-2017 (yellow).

723 **Fig 3.** Effects of day length on days to first flag and days to first flower for 33 *Miscanthus* and  
724 two *Sorghum bicolor* genotypes grown in controlled environment chambers at constant 23 °C.  
725 The *Miscanthus* genotypes included 28 *M. sinensis*, 2 *M. floridulus*, 2 diploid *M. ×giganteus*, and  
726 1 triploid *M. ×giganteus*. The genotypes were evaluated for response to three day-length  
727 treatments: 15 h (orange data), 12.5 h (green data) and 10 h (blue data), respectively. Pattern-

728 filled bars represent days to first flag leaf, and solid-filled bars represent days to first flowering.  
729 Note that some *Miscanthus* genotypes flagged but did not flower. Collection sites of the wild-  
730 collected genotypes are shown by their placement on the geographic map. *Miscanthus* genotype  
731 names are printed in colors representing six *M. sinensis* genetic groups identified by Clark *et al.*  
732 (2014, 2015), which included Korea/North China (red), Yangtze-Qinling (green), Northern Japan  
733 (blue), Southern Japan (yellow), Sichuan Basin (orange), and Southeastern China plus tropical  
734 (purple); for interspecific hybrids between *M. sacchariflorus* and *M. sinensis*, the dominant *M.*  
735 *sinensis* genetic group is shown. The inset boxplots depict variation among and within the three  
736 day-length treatments; treatments labeled with the same letter were not significantly different  
737 based on Tukey's HSD test at  $\alpha=0.05$ . The inset regression plots show linear relationships  
738 between traits and absolute values of latitude at collection sites for the 28 *Miscanthus* genotypes  
739 with geographical information. Note that short days typically advanced flowering up to some  
740 optimum, which differed for accessions from different latitudes of origin; higher latitude  
741 accessions failed to flower under 10 and 12.5 h, whereas some low latitude accessions failed to  
742 flower under 15 h day length. Some *M. sinensis* accessions from between 20 to 25 °N (PMS-226,  
743 PMS-359, and PMS-347) responded similarly to the three tested day lengths as the *Sorghum*  
744 *bicolor* short-day control (100M) but most *Miscanthus* accessions responded differently in part;  
745 all of the *Miscanthus* accessions responded differently than the *S. bicolor* day-neutral control  
746 (38M).

747 **Fig 4.** Effects of day length on total number of culms (A), and reproductive shoot ratio (B) for 33  
748 *Miscanthus* and two *Sorghum bicolor* genotypes grown in controlled environment chambers at  
749 constant 23 °C. The *Miscanthus* genotypes included 28 *M. sinensis*, 2 *M. floridulus*, 2 diploid *M.*  
750 *×giganteus*, and 1 triploid *M. ×giganteus*. The genotypes were evaluated for response to three  
751 day-length treatments: 15 h (orange data), 12.5 h (green data) and 10 h (blue data), respectively.  
752 Collection sites of the wild-collected genotypes are shown by their placement on the geographic  
753 map. *Miscanthus* genotype names are printed in colors representing six *M. sinensis* genetic  
754 groups identified by Clark *et al.* (2014, 2015), which included Korea/North China (red),  
755 Yangtze-Qinling (green), Northern Japan (blue), Southern Japan (yellow), Sichuan Basin  
756 (orange), and Southeastern China plus tropical (purple); for interspecific hybrids between *M.*  
757 *sacchariflorus* and *M. sinensis*, the dominant *M. sinensis* genetic group is shown. The inset  
758 boxplots depict variation among and within the three day-length treatments; treatments labeled  
759 with the same letter were not significantly different based on Tukey's HSD test at  $\alpha=0.05$ . The  
760 inset regression plots show linear relationships between traits and absolute values of latitude at  
761 collection sites for the 28 *Miscanthus* genotypes with geographical information.

762 **Fig 5.** Effects of day length on culm length (A), and leaf number (B) for 33 *Miscanthus* and two  
763 *Sorghum bicolor* genotypes grown in controlled environment chambers at constant 23 °C. The  
764 *Miscanthus* genotypes included 28 *M. sinensis*, 2 *M. floridulus*, 2 diploid *M. ×giganteus*, and 1  
765 triploid *M. ×giganteus*. The genotypes were evaluated for response to three day length  
766 treatments: 15 h (orange data), 12.5 h (green data) and 10 h (blue data), respectively. Collection  
767 sites of the genotypes obtained from the wild are shown by their placement on the geographic  
768 map. *Miscanthus* genotype names are printed in colors representing six *M. sinensis* genetic  
769 groups identified by Clark *et al.* (2014, 2015), which included Korea/North China (red),



770 Yangtze-Qinling (green), Northern Japan (blue), Southern Japan (yellow), Sichuan Basin  
771 (orange), and Southeastern China plus tropical (purple); for interspecific hybrids between *M.*  
772 *sacchariflorus* and *M. sinensis*, the dominant *M. sinensis* genetic group is shown. The inset  
773 boxplots depict variation among and within the three day-length treatments; treatments labeled  
774 with the same letter were not significantly different based on Tukey's HSD test at  $\alpha=0.05$ . The  
775 inset regression plots show linear relationships between traits and absolute values of latitude at  
776 collection sites for the 28 *Miscanthus* genotypes with geographical information. Note that under  
777 15 h days culm length was greatest and only weakly associated with latitude of origin, whereas  
778 culm length shortest under 10 h days but strongly associated with latitude of origin. Also note  
779 that accessions from central and northern Japan had fewer leaves under 10 and 12.5 h than at 15  
780 h; in contrast, accessions from similar latitudes in China when grown under short days had  
781 similar or greater numbers of leaves as under long days, yet the accessions from China and Japan  
782 both had short culms when grown under short days, indicating different mechanisms of  
783 responding to day length resulting in similar height outcomes.

784 **Fig 6.** Photographs of plants at the end of the growth chamber experiments on the effect of day-  
785 length on *Miscanthus*. Plants were tested under each of three day lengths: 10, 12.5, and 15 h.  
786 Colored background behind *Miscanthus* genotype names represent the *M. sinensis* genetic groups  
787 identified by Clark *et al.* (2014, 2015), which included Korea/North China (red), Yangtze-  
788 Qinling (green), Northern Japan (blue), Southern Japan (yellow), Sichuan Basin (orange), and  
789 Southeastern China plus tropical (purple); for interspecific hybrids between *M. sacchariflorus*  
790 and *M. sinensis* (Nippon and M×g '1993-1780'), the dominant *M. sinensis* genetic group is  
791 shown. Representatives of each genetic group and a range of latitudes (in parentheses) are  
792 shown. In each photo, plant size is scaled by either a 20 cm ruler (black and white) or a 1 m stick  
793 (orange and white). Note that accessions originating from high latitudes typically remained short  
794 and had few or no flowering stems when grown under short days but were taller and flowered  
795 when grown under long days.

796

## 797 **Supporting Information**

798 **S1 Fig.** Photographs of *Miscanthus* from the Southeastern China plus tropical group at the end of  
799 the growth chamber experiments on the effect of day-length on *Miscanthus*. Plants were tested  
800 under each of three day lengths: 10, 12.5, and 15 h. Colored background behind *Miscanthus*  
801 genotype names represent the *M. sinensis* genetic groups identified by Clark *et al.* (2014, 2015),  
802 which included Korea/North China (red), Yangtze-Qinling (green), Northern Japan (blue),  
803 Southern Japan (yellow), Sichuan Basin (orange), and Southeastern China plus tropical (purple).  
804 In each photo, plant size is scaled by either a 20 cm ruler (black and white) or a 1 m stick  
805 (orange and white).

806 **S2 Fig.** Photographs of *Miscanthus* from China and Japan at the end of the growth chamber  
807 experiments on the effect of day-length on *Miscanthus*. Plants were tested under each of three  
808 day lengths: 10, 12.5, and 15 h. Colored background behind *Miscanthus* genotype names  
809 represent the *M. sinensis* genetic groups identified by Clark *et al.* (2014, 2015), which included

810 Korea/North China (red), Yangtze-Qinling (green), Northern Japan (blue), Southern Japan  
811 (yellow), Sichuan Basin (orange), and Southeastern China plus tropical (purple); for interspecific  
812 hybrids (PMS-300) between *M. sacchariflorus* and *M. sinensis*, the dominant *M. sinensis* genetic  
813 group is shown. In each photo, plant size is scaled by either a 20 cm ruler (black and white) or a  
814 1 m stick (orange and white). Note that accessions originating from high latitudes typically  
815 remained short and had few or no flowering stems when grown under short days but were taller  
816 and flowered when grown under long days.

817 **S1 Table.** First flowering date of *Miscanthus* and sugarcane in 2014-2015 greenhouse  
818 experiment.

819 **S2 Table.** First flowering date of *Miscanthus* and sugarcane in 2015-2016 greenhouse  
820 experiment.

821 **S3 Table.** First flowering date of *Miscanthus* and sugarcane in 2016-2017 greenhouse  
822 experiment.

823 **S4 Table.** Trait summary statistics in the controlled growth chamber experiment.

**Table 1** *Miscanthus* genotypes included in a study, conducted in Urbana, IL over three years, on how cultural management treatments of greenhouse-grown plants affects flowering time. In each year (2014-2016), plants were grown in a greenhouse that provided decreasing day length of 1 min per day via supplemental light from high intensity discharge (HID) lamps starting when natural day length reached 12.5 h in Urbana, IL (14 September) until day length reached 11 h (13 December), then held constant until natural day length exceeded this value on 22 February. In 2016, an additional set of *Miscanthus* plants were also grown in a second greenhouse at Urbana, IL, in which day length was held at a constant 13 h via supplemental HID lamps, starting on 2 September until natural day length exceeded this value on 9 April.

| Entry                                                          | Ploidy | Lat.  | Long. | Number of pots |          |                   |            |                         |                           |            |                                             |                                          |
|----------------------------------------------------------------|--------|-------|-------|----------------|----------|-------------------|------------|-------------------------|---------------------------|------------|---------------------------------------------|------------------------------------------|
|                                                                |        |       |       | 2014-2015†     |          |                   | 2015-2016‡ |                         |                           | 2016-2017§ |                                             |                                          |
|                                                                |        |       |       | Control        | Cut only | Cut plus 4°C cold | Control    | Single rhizome planting | Cold storage pot division | Control    | 1 min d <sup>-1</sup> decreasing day length | Constant 13 h d <sup>-1</sup> day length |
| <i>M. ×giganteus</i> ‘Illinois-6x.06 (M×g2x-6)’                | 6x     |       |       | 6              | 15       | 15                | 3          |                         |                           | 3          |                                             |                                          |
| <i>M. floridulus</i> ‘US56-0022-03’                            | 2x     | -20.9 | 165.3 | 6              | 15       | 15                | 3          |                         |                           | 3          |                                             |                                          |
| <i>M. sacchariflorus</i> ‘PMS-075’                             | 2x     | 40.1  | 116.2 | 6              | 15       | 15                | 3          |                         |                           | 3          |                                             |                                          |
| <i>M. sacchariflorus</i> ssp. <i>lutarioriparius</i> ‘PF30022’ | 2x     |       |       | 6              | 15       | 15                | 3          |                         |                           | 3          |                                             |                                          |
| <i>M. sacchariflorus</i> 4x ‘Gifu-2010-008’                    | 4x     | 35.4  | 136.8 | 6              | 15       | 15                | 3          | 12                      | 8                         | 3          | 9                                           | 9                                        |
| <i>M. sacchariflorus</i> 4x ‘PF30153’                          | 4x     |       |       | 6              | 15       | 15                | 3          | 12                      | 8                         | 3          | 9                                           | 9                                        |
| <i>M. sacchariflorus</i> 4x ‘Tōhoku-2010-034’                  | 4x     | 38.7  | 139.9 | 6              | 15       | 15                | 3          |                         |                           | 3          |                                             |                                          |
| <i>M. sinensis</i> ‘PMS-204’                                   | 2x     | 31.7  | 114.9 | 6              | 15       | 15                | 3          |                         |                           | 3          |                                             |                                          |
| <i>M. sinensis</i> ‘PMS-375’                                   | 2x     | 19.6  | 110.3 | 6              | 15       | 15                | 3          |                         |                           | 3          |                                             |                                          |
| <i>M. sinensis</i> ‘PMS-436’                                   | 2x     | 41.3  | 123.7 | 6              | 15       | 15                | 3          |                         |                           | 3          |                                             |                                          |
| <i>M. sacchariflorus</i> ‘RU2012-016’                          | 2x     | 47.2  | 134.4 |                |          |                   | 3          | 12                      | 8                         | 3          | 9                                           | 9                                        |
| <i>M. sacchariflorus</i> ‘RU2012-037’                          | 2x     | 49.1  | 136.5 |                |          |                   | 3          | 12                      | 8                         | 3          | 9                                           | 9                                        |
| <i>M. sacchariflorus</i> ‘RU2012-050’                          | 2x     | 48.9  | 136.2 |                |          |                   | 3          | 12                      | 8                         | 3          | 9                                           | 9                                        |
| <i>M. sacchariflorus</i> ‘RU2012-078’                          | 2x     | 48.7  | 133.0 |                |          |                   | 3          | 12                      | 8                         | 3          | 9                                           | 9                                        |
| <i>M. sacchariflorus</i> ‘RU2012-112’                          | 2x     | 48.6  | 133.9 |                |          |                   | 3          | 12                      | 8                         | 3          | 9                                           | 9                                        |
| <i>M. sacchariflorus</i> ‘RU2012-120’                          | 2x     | 48.6  | 134.4 |                |          |                   | 3          | 12                      | 8                         | 3          | 9                                           | 9                                        |
| <i>M. sacchariflorus</i> 4x ‘Gifu-2010-024’                    | 4x     | 35.6  | 137.0 |                |          |                   | 3          | 12                      | 8                         | 3          | 9                                           | 9                                        |
| <i>M. sacchariflorus</i> 4x ‘JM11-019’                         | 4x     | 35.1  | 132.3 |                |          |                   | 3          | 12                      | 8                         | 3          | 9                                           | 9                                        |
| <i>M. sacchariflorus</i> 4x ‘JM11-040’                         | 4x     | 34.8  | 132.9 |                |          |                   | 3          | 12                      | 8                         | 3          | 9                                           | 9                                        |

|                                               |    |      |       |   |    |   |   |   |   |
|-----------------------------------------------|----|------|-------|---|----|---|---|---|---|
| <i>M. sacchariflorus</i> 4x 'PF30157'         | 4x |      |       | 3 | 12 | 8 | 3 | 9 | 9 |
| <i>M. sacchariflorus</i> 4x 'Tōhoku-2010-025' | 4x | 39.7 | 140.2 | 3 | 12 | 8 | 3 | 9 | 9 |
| <i>M. sacchariflorus</i> 4x 'Tōhoku-2010-036' | 4x | 38.4 | 140.3 | 3 | 12 | 8 | 3 | 9 | 9 |
| <i>M. sacchariflorus</i> 4x 'Tōhoku-2010-037' | 4x | 38.4 | 140.3 | 3 | 12 | 8 | 3 | 9 | 9 |

†Pots of *Miscanthus* were established on 21 April 2014. Each of the 10 genotypes had six control pots that were grown in the greenhouse without any further treatments. *Miscanthus* treatments included 1) cutting plants ~15 cm above the soil and allowing them to immediately regrow, 2) cutting the plants and storing them for 1 month at 4 °C before returning them to the greenhouse to regrow, and 3) uncut controls. For the 10 *Miscanthus* genotypes, each of the cut and cut plus cold treatments was applied to 3 pots monthly from September to January. Empty cells indicate genotypes that were not included for specific year's experiment.

‡Treatments were 1) stored rhizomes (planted every 4 weeks starting on 3 June 2015), 2) divisions of stored pots (planted every 4 weeks starting on 3 June 2015), and 3) controls (actively growing plants cut ~15 cm above the soil surface on 3 June). Each of the 23 genotypes had three control pots. For 15 selected *M. sacchariflorus* genotypes, three pots of single rhizome planting and two pots of cold storage pot division were made for each genotype monthly from June to September.

§Pots of *Miscanthus* were established on 29 July 2016. Control pots cut ~15 cm above the soil surface were compared with a set of pots stored at 4 °C and returned to the greenhouse at 4-week intervals from September to November. Each of the 23 genotypes had three control pots. For 15 selected *M. sacchariflorus* genotypes, six stored divisions per *Miscanthus* genotype were removed from cold storage monthly and three of these were planted in a greenhouse with 1 min d<sup>-1</sup> decreasing photoperiod protocol and another three divisions were planted in another greenhouse with a constant 13 h d<sup>-1</sup> day length.

**Table 2** Sugarcane and intergeneric hybrid genotypes included in a study of flowering time management in a greenhouse at Urbana, IL over three years. In each year (2014-2016), plants were grown in a greenhouse that provided decreasing day length of 1 min d<sup>-1</sup> via supplemental light from high intensity discharge (HID) lamps starting when natural day length reached 12.5 h in Urbana, IL (14 September) until day length reached 11 h (13 December), then held constant until natural day length exceeded this value on 22 February.

| Entry                                                                          | Accession  | Number of pots |           |           |
|--------------------------------------------------------------------------------|------------|----------------|-----------|-----------|
|                                                                                |            | 2014-2015      | 2015-2016 | 2016-2017 |
| <i>Miscanthus</i> × <i>Saccharum officinarum</i> ‘Fiji 17’                     | PI212268   |                |           | 2         |
| <i>Miscanthus</i> × <i>Saccharum officinarum</i> ‘Fiji 53’                     | PI271853   |                |           | 2         |
| <i>Miscanthus</i> × <i>Saccharum officinarum</i> ‘Fiji 54’                     | PI268060   |                |           | 2         |
| <i>Miscanthus</i> × <i>Saccharum officinarum</i> ‘Fiji 55’                     | PI271854   |                |           | 2         |
| <i>Miscanthus</i> × <i>Saccharum officinarum</i> ‘Fiji 57’                     | PI276960   |                |           | 2         |
| <i>Miscanthus</i> × <i>Saccharum officinarum</i> ‘Fiji 59’                     | PI268061   |                |           | 2         |
| <i>Miscanthus</i> × <i>Saccharum officinarum</i> ‘Raiatea’                     | Q37075     | 8              |           |           |
| <i>Saccharum</i> hybr. ‘CP14-1613’                                             | CP14-1613  |                |           | 2         |
| <i>Saccharum</i> hybr. ‘CP14-1931’                                             | CP14-1931  |                |           | 2         |
| <i>Saccharum</i> hybr. ‘H96-3580’                                              | UI13-00001 | 1              |           |           |
| <i>Saccharum</i> hybr. ‘Ho06-9001’                                             | Ho06-9001  | 8              | 6         | 6         |
| <i>Saccharum</i> hybr. ‘Ho06-9002’                                             | Ho06-9002  | 8              | 6         | 6         |
| <i>Saccharum</i> hybr. ‘Ho91-552’                                              | Ho91-552   | 1              | 6         | 6         |
| <i>Saccharum</i> hybr. ‘HoCP96-540’                                            | HoCP96-540 | 1              | 6         | 6         |
| <i>Saccharum</i> hybr. ‘L09-105’                                               | L09-105    | 8              | 6         | 6         |
| <i>Saccharum</i> hybr. ‘L79-1002’                                              | PI651501   | 8              | 6         | 6         |
| <i>Saccharum</i> hybr. ‘L99-226’                                               | L99-226    | 1              |           |           |
| <i>Saccharum</i> hybr. ‘US 84-1058’                                            | US 84-1058 | 2              | 6         | 6         |
| <i>Saccharum</i> hybr. ‘US 87-1019’                                            | US 87-1019 | 2              | 6         | 6         |
| <i>Saccharum</i> hybrid ‘POJ 2725’ × <i>Sorghum durra</i>                      | PI114375   | 1              |           |           |
| <i>Saccharum officinarum</i> ‘Ho02-113’                                        | Ho02-113   | 2              |           |           |
| <i>Saccharum officinarum</i> ‘Ho02-144’                                        | Ho02-144   | 2              | 6         | 6         |
| <i>Saccharum officinarum</i> ‘Ho02-147’                                        | Ho02-147   | 2              |           |           |
| <i>Saccharum robustum</i> ‘MOL 6081’                                           | UI13-00003 | 2              | 2         | 2         |
| <i>Saccharum spontaneum</i> ‘IND 81-146’                                       | PI504789   | 2              |           |           |
| <i>Saccharum spontaneum</i> ‘Saudi Arabia’                                     | PI576871   | 2              | 2         | 2         |
| <i>Saccharum spontaneum</i> ‘SES 234’                                          | PI495752   | 2              |           |           |
| <i>Saccharum arundinaceum</i> ‘UI11-00040’†                                    | UI11-00040 | 1              | 1         | 1         |
| <i>Saccharum arundinaceum</i> ‘US 67-0009-02’†                                 | PI318615   | 1              | 1         | 1         |
| <i>Saccharum arundinaceum</i> ‘US 71-0122-01’†                                 | PI367838   | 1              | 1         | 1         |
| ( <i>Saccharum arundinaceum</i> × <i>Miscanthus</i> ) ‘Purple People Greeter’† | UI11-00041 | 1              | 1         | 1         |

†*Saccharum arundinaceum*, *arundinaceum* ‘US 67-0009-02’, *Saccharum arundinaceum* ‘US 71-0122-01’, and the interspecific hybrid (*Saccharum* × *Miscanthus*) ‘Purple People Greeter’ were grown in a separate greenhouse under natural day length in Urbana, IL.

**Table 3** The 33 *Miscanthus* genotypes and two *Sorghum* controls included in a study on the effect of day length on flowering time, conducted in controlled environment chambers.

| Entry                                                     | Lat† | Long  | Genetic group‡         | Genetic group color code | Days to first flowering |        |      |
|-----------------------------------------------------------|------|-------|------------------------|--------------------------|-------------------------|--------|------|
|                                                           |      |       |                        |                          | 10 h                    | 12.5 h | 15 h |
| <i>M. sinensis</i> ‘Teshio’                               | 44.9 | 141.9 | Northern Japan         | Blue                     |                         |        | 66   |
| <i>M. sinensis</i> ‘EBI-2008-51c’                         | 43.5 | 142.7 | Northern Japan         | Blue                     |                         | 42     | 67   |
| <i>M. sinensis</i> ‘EBI-2008-32a’                         | 43.4 | 141.4 | Northern Japan         | Blue                     |                         |        | 83   |
| <i>M. sinensis</i> ‘Tōhoku-2010-015a’                     | 40.2 | 140.2 | Northern Japan         | Blue                     |                         |        | 105  |
| <i>M. sinensis</i> ‘Koike-11a’                            | 38.0 | 138.4 | Southern Japan         | Yellow                   |                         |        | 126  |
| <i>M. sinensis</i> ‘Koike-12b’                            | 36.7 | 137.2 | Southern Japan         | Yellow                   |                         |        | 130  |
| <i>M. sinensis</i> ‘Sugadaira’                            | 36.0 | 138.1 | Southern Japan         | Yellow                   |                         |        | 96   |
| <i>M. sinensis</i> ‘Koike-21c’                            | 32.2 | 130.4 | Southern Japan         | Yellow                   | 49                      | 61     | 164  |
| <i>M. sinensis</i> ‘Miyazaki’                             | 31.8 | 131.4 | Southern Japan         | Yellow                   | 44                      | 61     | 167  |
| <i>M. sinensis</i> ‘Flamingo’                             |      |       | Southern Japan         | Yellow                   |                         |        | 121  |
| <i>M. sinensis</i> ‘Gracillimus’                          |      |       | Southern Japan         | Yellow                   |                         |        | 194  |
| <i>M. sinensis</i> × <i>M. sacchariflorus</i> BC ‘Nippon’ |      |       | Southern Japan         | Yellow                   | 26                      | 56     | 74   |
| <i>M. sinensis</i> ssp. <i>condensatus</i> ‘Cabaret’      |      |       | Southern Japan         | Yellow                   |                         | 109    | 229  |
| <i>M. ×giganteus</i> ‘1993-1780’                          |      |       | Southern Japan         | Yellow                   | 98                      | 71     | 140  |
| <i>M. sinensis</i> ‘PMS-436’                              | 41.3 | 123.7 | Korea/North China      | Red                      |                         |        | 115  |
| <i>M. sinensis</i> ‘PMS-438’                              | 41.3 | 123.7 | Korea/North China      | Red                      |                         |        | 72   |
| <i>M. sinensis</i> ‘PMS-164’                              | 37.3 | 114.3 | Yangtze-Qinling        | Green                    |                         |        | 130  |
| <i>M. sinensis</i> ‘PMS-161’                              | 35.7 | 112.3 | Yangtze-Qinling        | Green                    |                         |        | 133  |
| <i>M. sinensis</i> ‘PMS-159’                              | 34.1 | 111.0 | Yangtze-Qinling        | Green                    |                         |        | 96   |
| <i>M. sinensis</i> ‘PMS-130’                              | 33.5 | 105.1 | Yangtze-Qinling        | Green                    | 42                      |        | 119  |
| <i>M. sinensis</i> ‘PMS-204’                              | 31.7 | 114.9 | Yangtze-Qinling        | Green                    |                         |        | 170  |
| <i>M. sinensis</i> × <i>M. sacchariflorus</i> ‘PMS-300’   | 30.8 | 120.1 | Yangtze-Qinling        | Green                    |                         |        | 212  |
| <i>M. sinensis</i> ‘PMS-306’                              | 29.9 | 118.8 | Yangtze-Qinling        | Green                    |                         | 84     | 173  |
| <i>M. sinensis</i> ‘PMS-314’                              | 26.5 | 119.6 | Yangtze-Qinling        | Green                    |                         |        | 166  |
| <i>M. sinensis</i> ‘PMS-226’                              | 26.6 | 106.8 | Sichuan Basin          | Orange                   | 56                      | 76     | 189  |
| <i>M. sinensis</i> ‘Onna-1a’                              | 26.5 | 126.8 | SE China plus tropical | Purple                   |                         |        | 274  |
| <i>M. sinensis</i> ‘Uruma-1b’                             | 26.3 | 127.9 | SE China plus tropical | Purple                   |                         |        | 360  |



|                                                                                                         |       |       |                        |        |    |     |     |
|---------------------------------------------------------------------------------------------------------|-------|-------|------------------------|--------|----|-----|-----|
| <i>M. sinensis</i> ‘PMS-347’                                                                            | 24.2  | 115.9 | SE China plus tropical | Purple | 81 | 91  | 247 |
| <i>M. sinensis</i> ‘PMS-359’                                                                            | 22.9  | 112.3 | SE China plus tropical | Purple | 63 | 81  | 179 |
| <i>M. sinensis</i> ‘PMS-375’                                                                            | 19.6  | 110.3 | SE China plus tropical | Purple | 91 | 142 |     |
| <i>M. sinensis</i> ‘PMS-382’                                                                            | 18.9  | 109.5 | SE China plus tropical | Purple | 91 | 184 |     |
| <i>M. floridulus</i> ‘NG77-022’                                                                         | -3.6  | 143.6 | SE China plus tropical | Purple |    | 95  | 135 |
| <i>M. floridulus</i> ‘US56-0022-03’                                                                     | -20.9 | 165.3 | SE China plus tropical | Purple |    | 114 |     |
| <i>S. bicolor</i> ‘100M’ (Ma <sub>1</sub> Ma <sub>2</sub> Ma <sub>3</sub> Ma <sub>4</sub> )             |       |       |                        |        | 52 | 73  | 138 |
| <i>S. bicolor</i> ‘38M’ (ma <sub>1</sub> ma <sub>2</sub> ma <sub>3</sub> <sup>R</sup> Ma <sub>4</sub> ) |       |       |                        |        | 60 | 60  | 50  |
| Average days to first flowering for 33<br><i>Miscanthus</i> genotypes                                   |       |       |                        |        | 64 | 90  | 151 |

Cultivar Nippon is sold as *M. sinensis* but has been shown by Clark *et al.* (2014) to be a cross between *M. sinensis* and *M. sacchariflorus* backcrossed to *M. sinensis*. All entries were diploid, except for *M. ×giganteus* ‘1993-1780’, which is triploid.

†Empty cells indicate no data was available.

‡*M. sinensis* genetic groups determined from Clark *et al.* (2014, 2015). For interspecific hybrids between *M. sacchariflorus* and *M. sinensis*, the dominant *M. sinensis* genetic group is shown.

**Table 4** Effect of genus (*Miscanthus* and *Saccharum*) and genotype within each genus on days to first flower for a series of experiments conducted in a greenhouse at Urbana, IL over three years. Only entries that flowered in each year were included in ANOVA analyses. Note that the ‘Genotype within genus’ term in ANOVA table could be fractioned into two sub-terms ‘*Miscanthus*’ and ‘*Saccharum*’, which were also tested separately.

| Experiment | Model Term               | DF  | Mean Squares | F value | Pr(>F) |
|------------|--------------------------|-----|--------------|---------|--------|
| 2014-2015  | Genus                    | 1   | 61910.0      | 2074.7  | <0.001 |
|            | Genotype within in genus | 20  | 8929.1       | 299.2   | <0.001 |
|            | <i>Miscanthus</i>        | 9   | 18330.7      | 776.1   | <0.001 |
|            | <i>Saccharum</i>         | 11  | 1237.0       | 11.8    | <0.001 |
|            | Residuals                | 221 | 29.8         |         |        |
| 2015-2016  | Genus                    | 1   | 87096.2      | 30821.6 | <0.001 |
|            | Genotype within in genus | 22  | 4197.9       | 964.3   | <0.001 |
|            | <i>Miscanthus</i>        | 20  | 3889.1       | 1926.2  | <0.001 |
|            | <i>Saccharum</i>         | 2   | 7286.7       | 743.5   | <0.001 |
|            | Residuals                | 50  | 1.4          |         |        |
| 2016-2017  | Genus                    | 1   | 74127.2      | 1820.7  | <0.001 |
|            | Genotype within in genus | 11  | 2131.6       | 52.4    | <0.001 |
|            | <i>Miscanthus</i>        | 7   | 1201.7       | 367.9   | <0.001 |
|            | <i>Saccharum</i>         | 4   | 3759.0       | 36.5    | <0.001 |
|            | Residuals                | 16  | 40.7         |         |        |

**Table 5** Effects of treatments on days to first flowering for *Miscanthus* in a series of greenhouse experiments conducted in Urbana, IL over three years. In each year (2014-2016), plants were grown in a greenhouse that provided decreasing day length of 1 min d<sup>-1</sup> via supplemental light from high intensity discharge (HID) lamps starting when natural day length reached 12.5 h in Urbana, IL (14 September) until day length reached 11 h (13 December), then held constant until natural day length exceeded this value on 22 February. In 2016, an additional set of *Miscanthus* plants were also grown in a second greenhouse at Urbana, IL, in which day length was held at a constant 13 h via supplemental HID lamps, starting on 2 September until natural day length exceeded this value on 9 April. In the 2014-2015 experiment, treatments included 1) cutting plants ~15 cm above the soil in September, December and January and allowing them to immediately regrow, 2) cutting the plants and storing them for 1 month at 4 °C before returning them to the greenhouse to regrow, and 3) uncut controls. In the 2015-2016 experiment, treatments were stored rhizomes, divisions of stored pots (each planted every 4 weeks starting on 3 June 2015), and controls (actively growing plants cut ~15 cm above the soil surface on 3 June). In the 2016-2017 experiment, treatments included control pots cut ~15 cm above the soil surface that were compared with a sets of pots stored at 4 °C and returned at 4-week intervals from September to November to one greenhouse with 1 min d<sup>-1</sup> decreasing photoperiod and to another greenhouse with a constant 13 h d<sup>-1</sup> day length. Only genotypes that flowered were included in ANOVA analyses. Except for the residual term, empty cells indicate that model terms could not be tested due to lack of data.

| Experiment | Model Term                   | DF | Mean squares | F value | Pr(>F) |
|------------|------------------------------|----|--------------|---------|--------|
| 2014-2015  | Genotype                     | 3  | 7529.4       | 2384.3  | <0.001 |
|            | Treatment                    | 2  | 47481.0      | 15035.2 | <0.001 |
|            | Month                        | 2  | 9972.3       | 3157.8  | <0.001 |
|            | Genotype × Treatment         | 3  | 760.5        | 240.8   | <0.001 |
|            | Genotype × Month             | 3  | 1558.5       | 493.5   | <0.001 |
|            | Treatment × Month            |    |              |         |        |
|            | Genotype × Treatment × Month |    |              |         |        |
|            | Residuals                    | 23 | 3.2          |         |        |
| 2015-2016  | Genotype                     | 14 | 3418.3       | 749.8   | <0.001 |
|            | Treatment                    | 2  | 15.2         | 3.3     | 0.042  |
|            | Month                        | 3  | 387.8        | 85.1    | <0.001 |
|            | Genotype × Treatment         | 22 | 76.1         | 16.7    | <0.001 |
|            | Genotype × Month             | 11 | 136.8        | 30.0    | <0.001 |
|            | Treatment × Month            | 1  | 7.7          | 1.7     | 0.197  |
|            | Genotype × Treatment × Month | 2  | 7.4          | 1.6     | 0.206  |
|            | Residuals                    | 68 | 4.6          |         |        |
| 2016-2017  | Genotype                     | 3  | 959.6        | 381.9   | <0.001 |
|            | Treatment                    | 2  | 3623.7       | 1442.1  | <0.001 |
|            | Month                        | 1  | 1.3          | 0.5     | 0.493  |
|            | Genotype × Treatment         | 2  | 1.4          | 0.5     | 0.594  |
|            | Genotype × Month             |    |              |         |        |

|                              |    |     |
|------------------------------|----|-----|
| Treatment × Month            |    |     |
| Genotype × Treatment × Month |    |     |
| Residuals                    | 13 | 2.5 |

---

**Table 6** Effects of genotype, photoperiod, and their interactions on nine flowering and morphological traits of *Miscanthus*. Data were collected on 33 *Miscanthus* genotypes evaluated under three photoperiods (10 h, 12.5 h, 15 h) in controlled environment chambers.

| Trait                         | Term                   | DF  | Mean squares | F     | Pr(>F) |
|-------------------------------|------------------------|-----|--------------|-------|--------|
| Days to first flagging        | Genotype               | 32  | 10833.5      | 66.2  | <0.001 |
|                               | Photoperiod            | 2   | 71082.7      | 434.4 | <0.001 |
|                               | Genotype × Photoperiod | 19  | 1540.3       | 9.4   | <0.001 |
|                               | Residuals              | 86  | 163.6        |       |        |
| Days to first flowering       | Genotype               | 32  | 8838.1       | 46.8  | <0.001 |
|                               | Photoperiod            | 2   | 84211.7      | 445.9 | <0.001 |
|                               | Genotype × Photoperiod | 19  | 1759.7       | 9.3   | <0.001 |
|                               | Residuals              | 84  | 188.9        |       |        |
| Culm length                   | Genotype               | 32  | 18186.2      | 43.1  | <0.001 |
|                               | Photoperiod            | 2   | 229606.3     | 544.3 | <0.001 |
|                               | Genotype × Photoperiod | 64  | 4530.7       | 10.7  | <0.001 |
|                               | Residuals              | 190 | 421.9        |       |        |
| Leaf number per culm          | Genotype               | 32  | 140.4        | 13.7  | <0.001 |
|                               | Photoperiod            | 2   | 112.7        | 11.0  | <0.001 |
|                               | Genotype × Photoperiod | 64  | 26.4         | 2.6   | <0.001 |
|                               | Residuals              | 190 | 10.3         |       |        |
| Number of reproductive shoots | Genotype               | 32  | 287.4        | 18.8  | <0.001 |
|                               | Photoperiod            | 2   | 3711.7       | 242.4 | <0.001 |
|                               | Genotype × Photoperiod | 64  | 243.8        | 15.9  | <0.001 |
|                               | Residuals              | 190 | 15.3         |       |        |
| Total number of culms         | Genotype               | 32  | 16168.4      | 29.2  | <0.001 |
|                               | Photoperiod            | 2   | 82253.1      | 148.7 | <0.001 |
|                               | Genotype × Photoperiod | 64  | 3746.4       | 6.8   | <0.001 |
|                               | Residuals              | 190 | 553.2        |       |        |
| Reproductive shoot ratio      | Genotype               | 32  | 0.0          | 5.7   | <0.001 |
|                               | Photoperiod            | 2   | 2.3          | 354.8 | <0.001 |
|                               | Genotype × Photoperiod | 64  | 0.1          | 10.4  | <0.001 |
|                               | Residuals              | 190 | 0.0          |       |        |

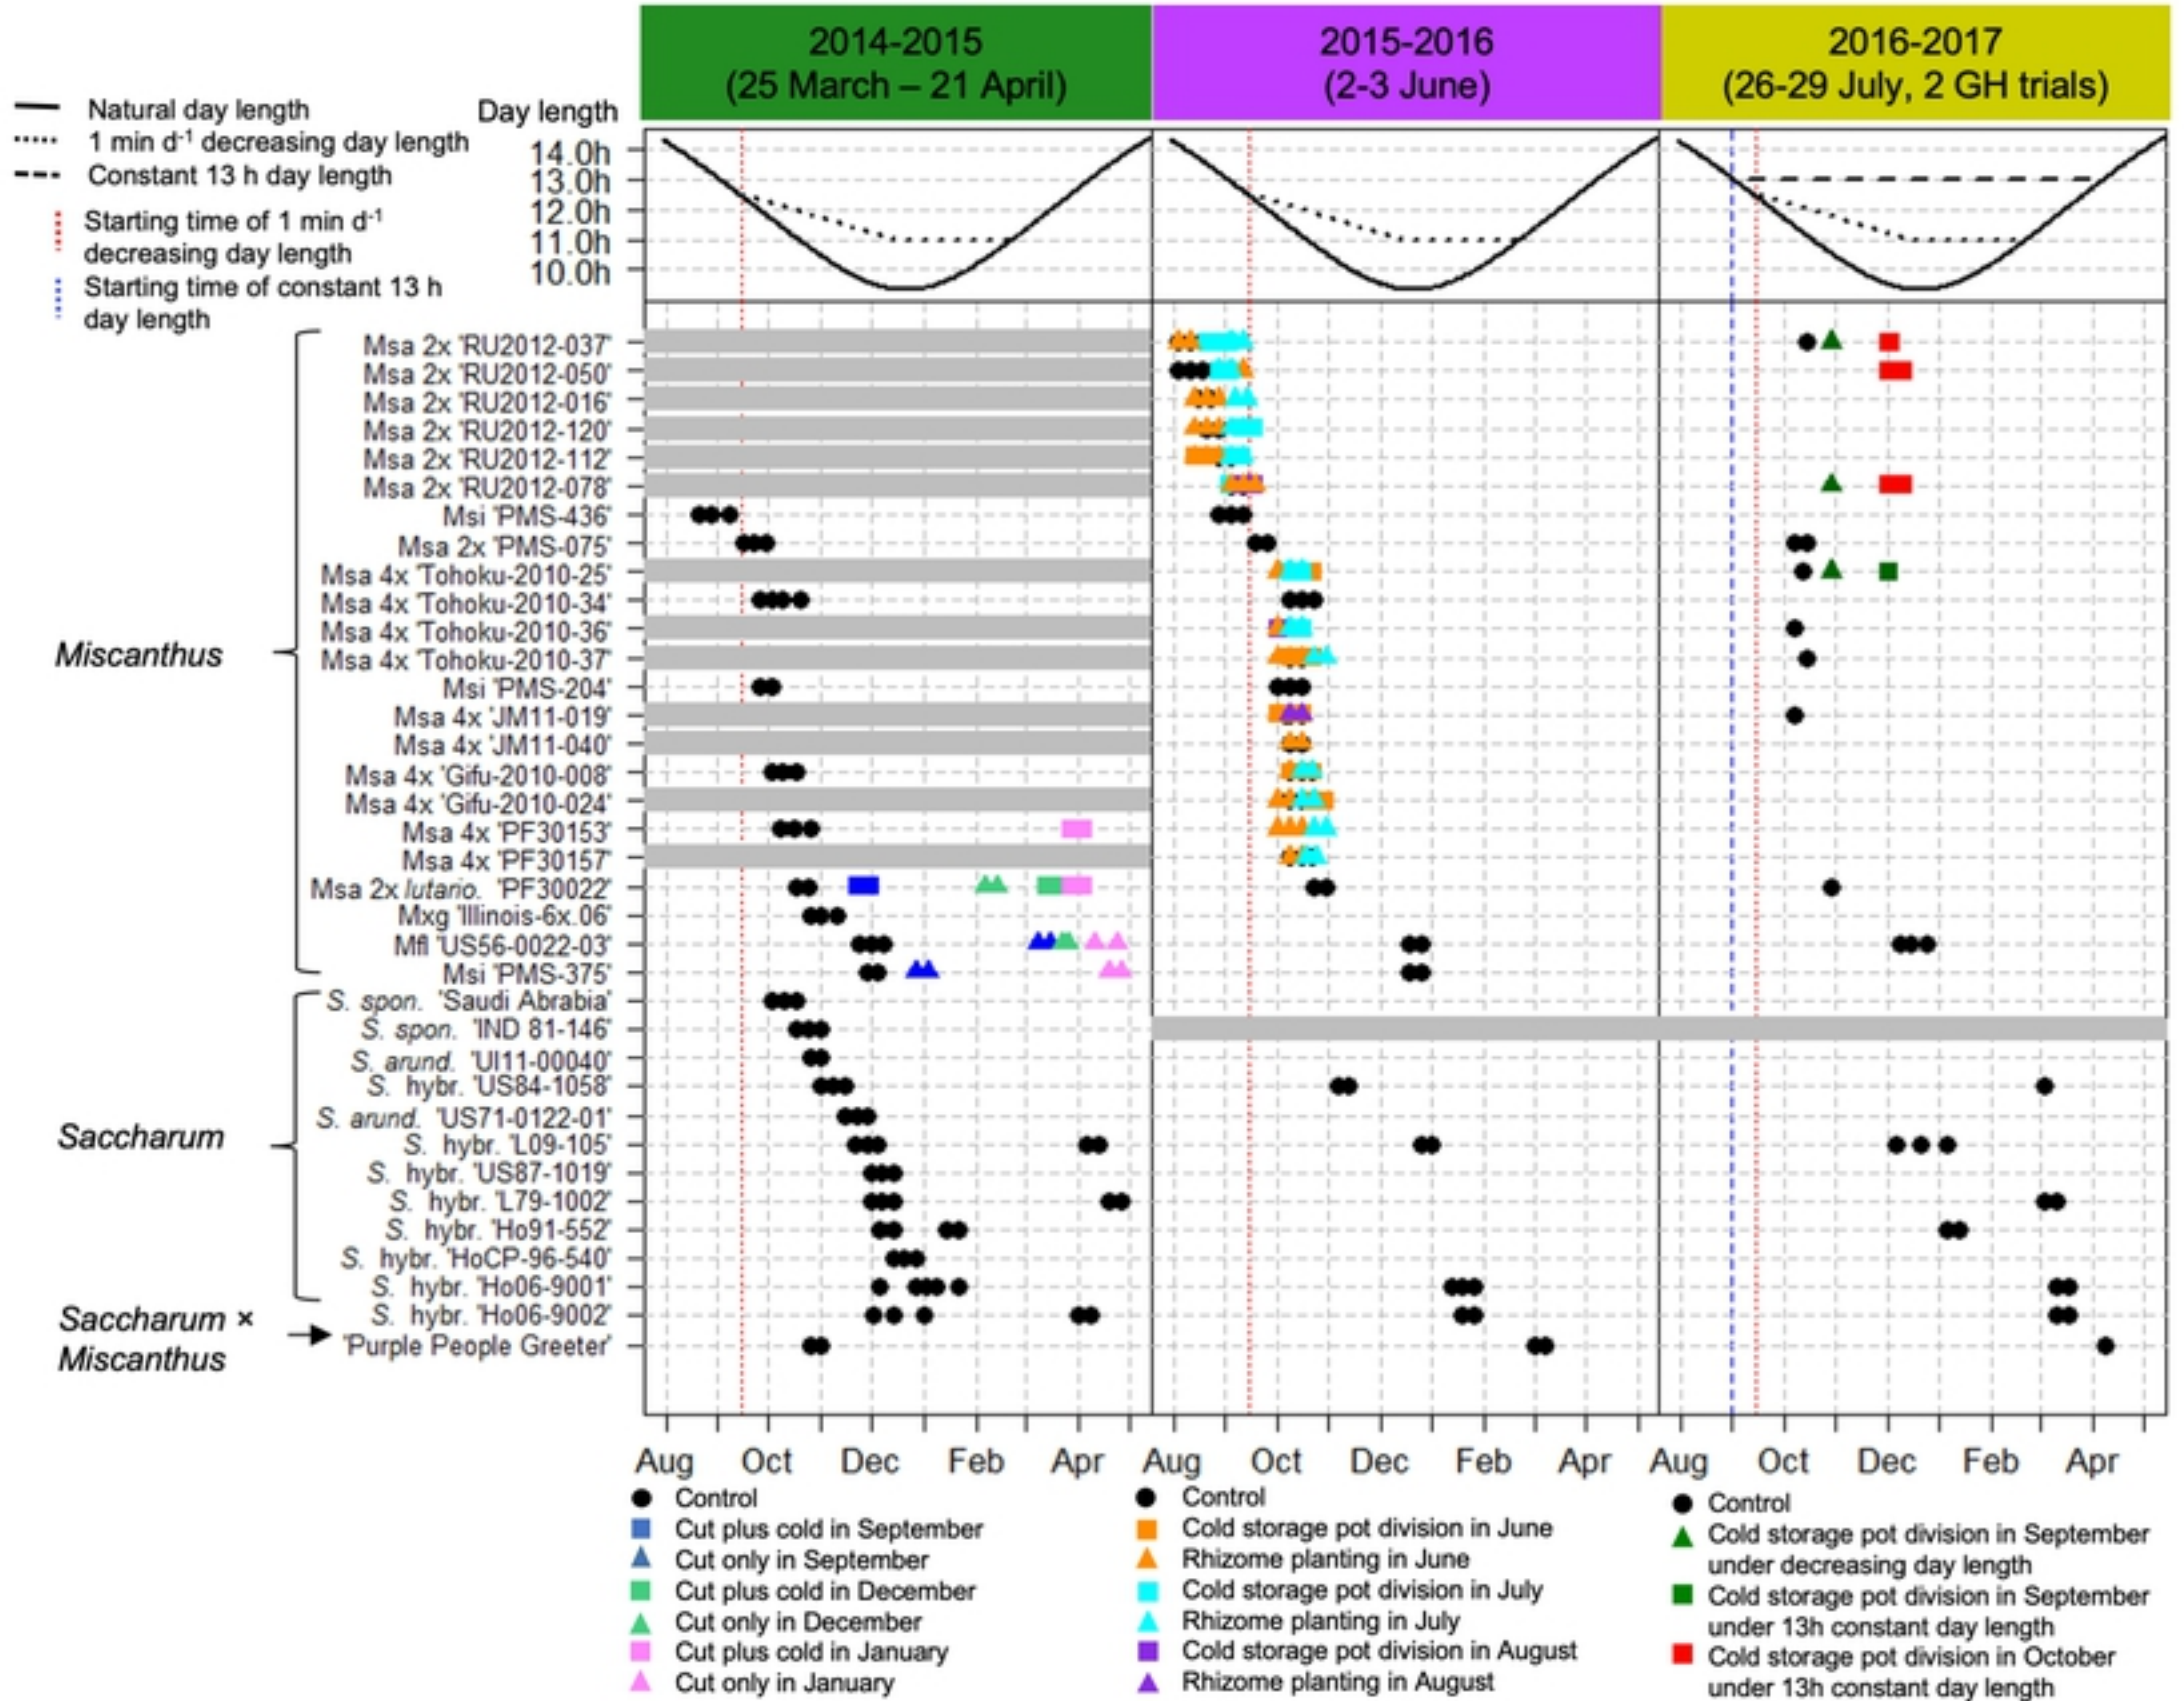

Figure



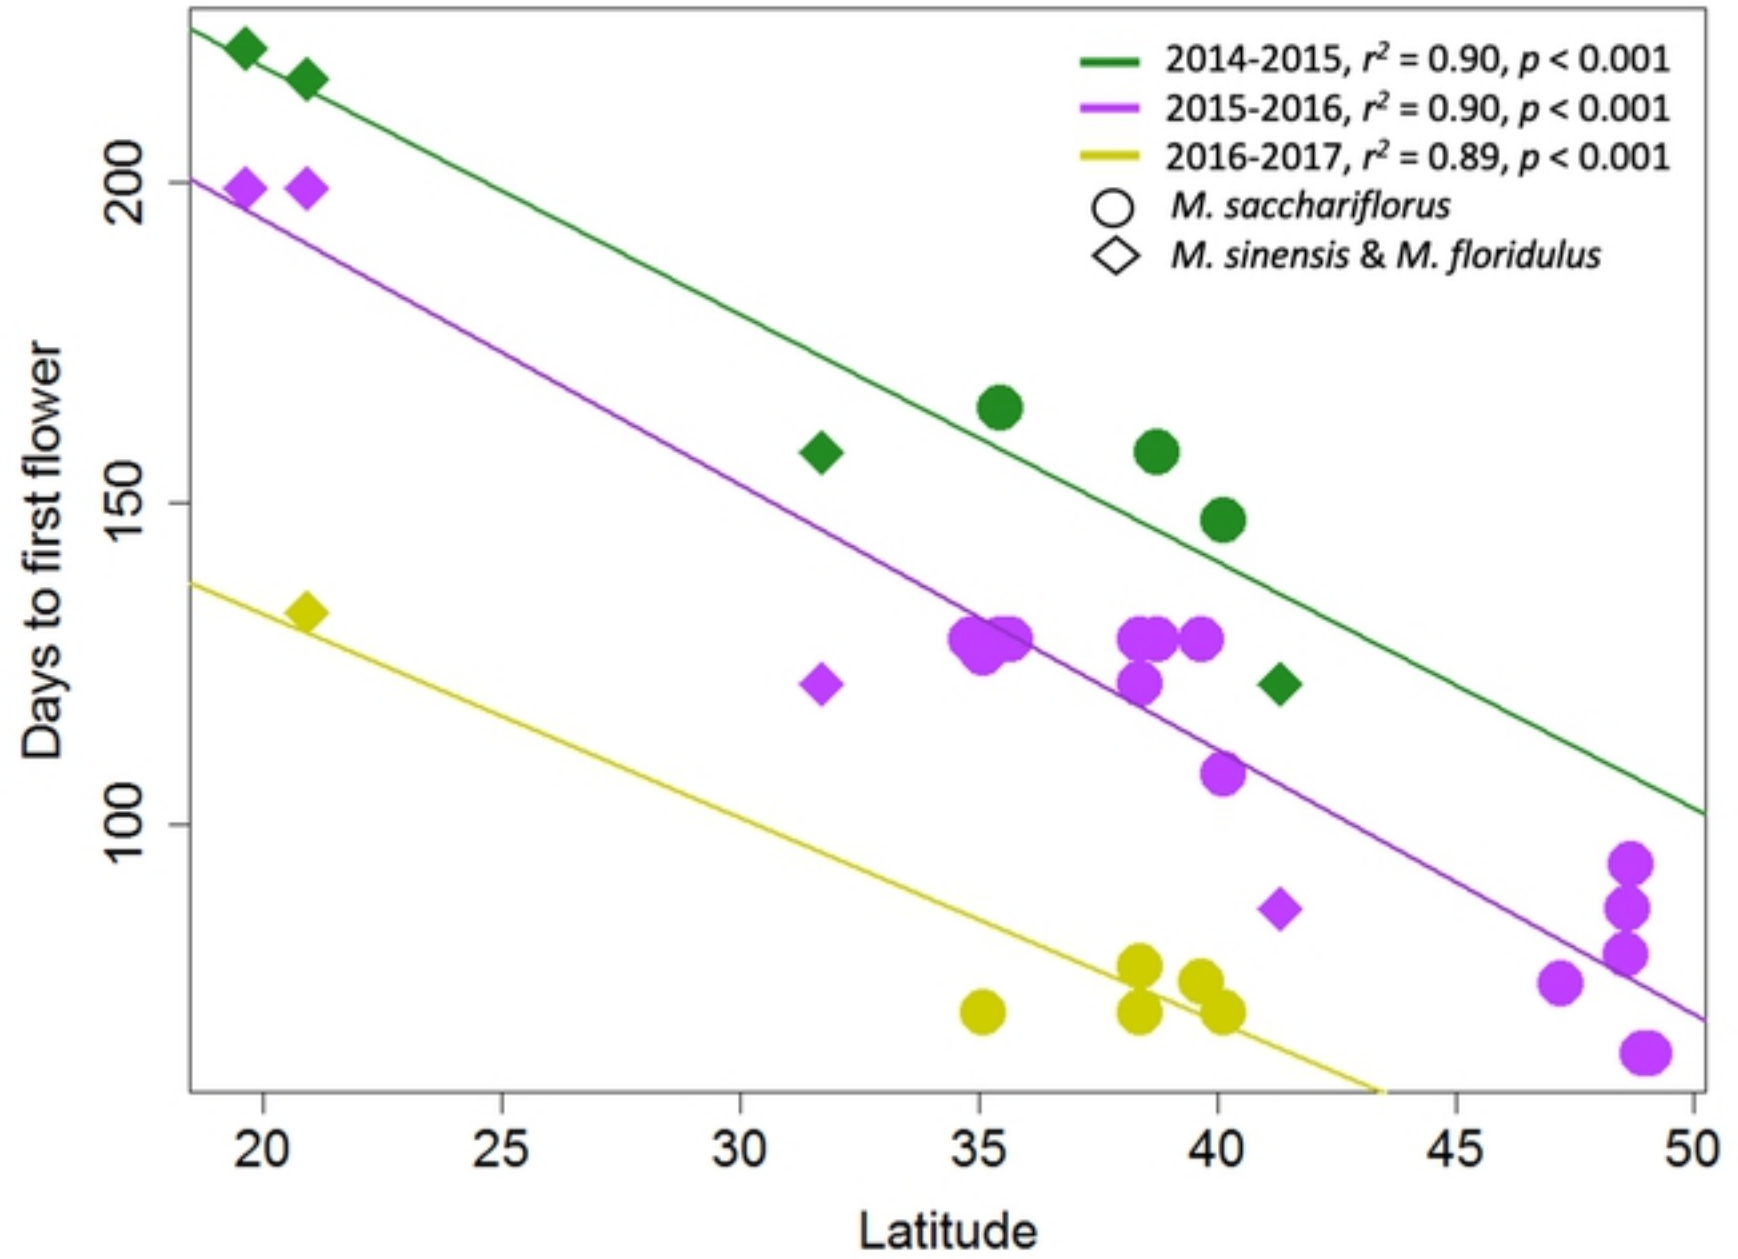

Figure

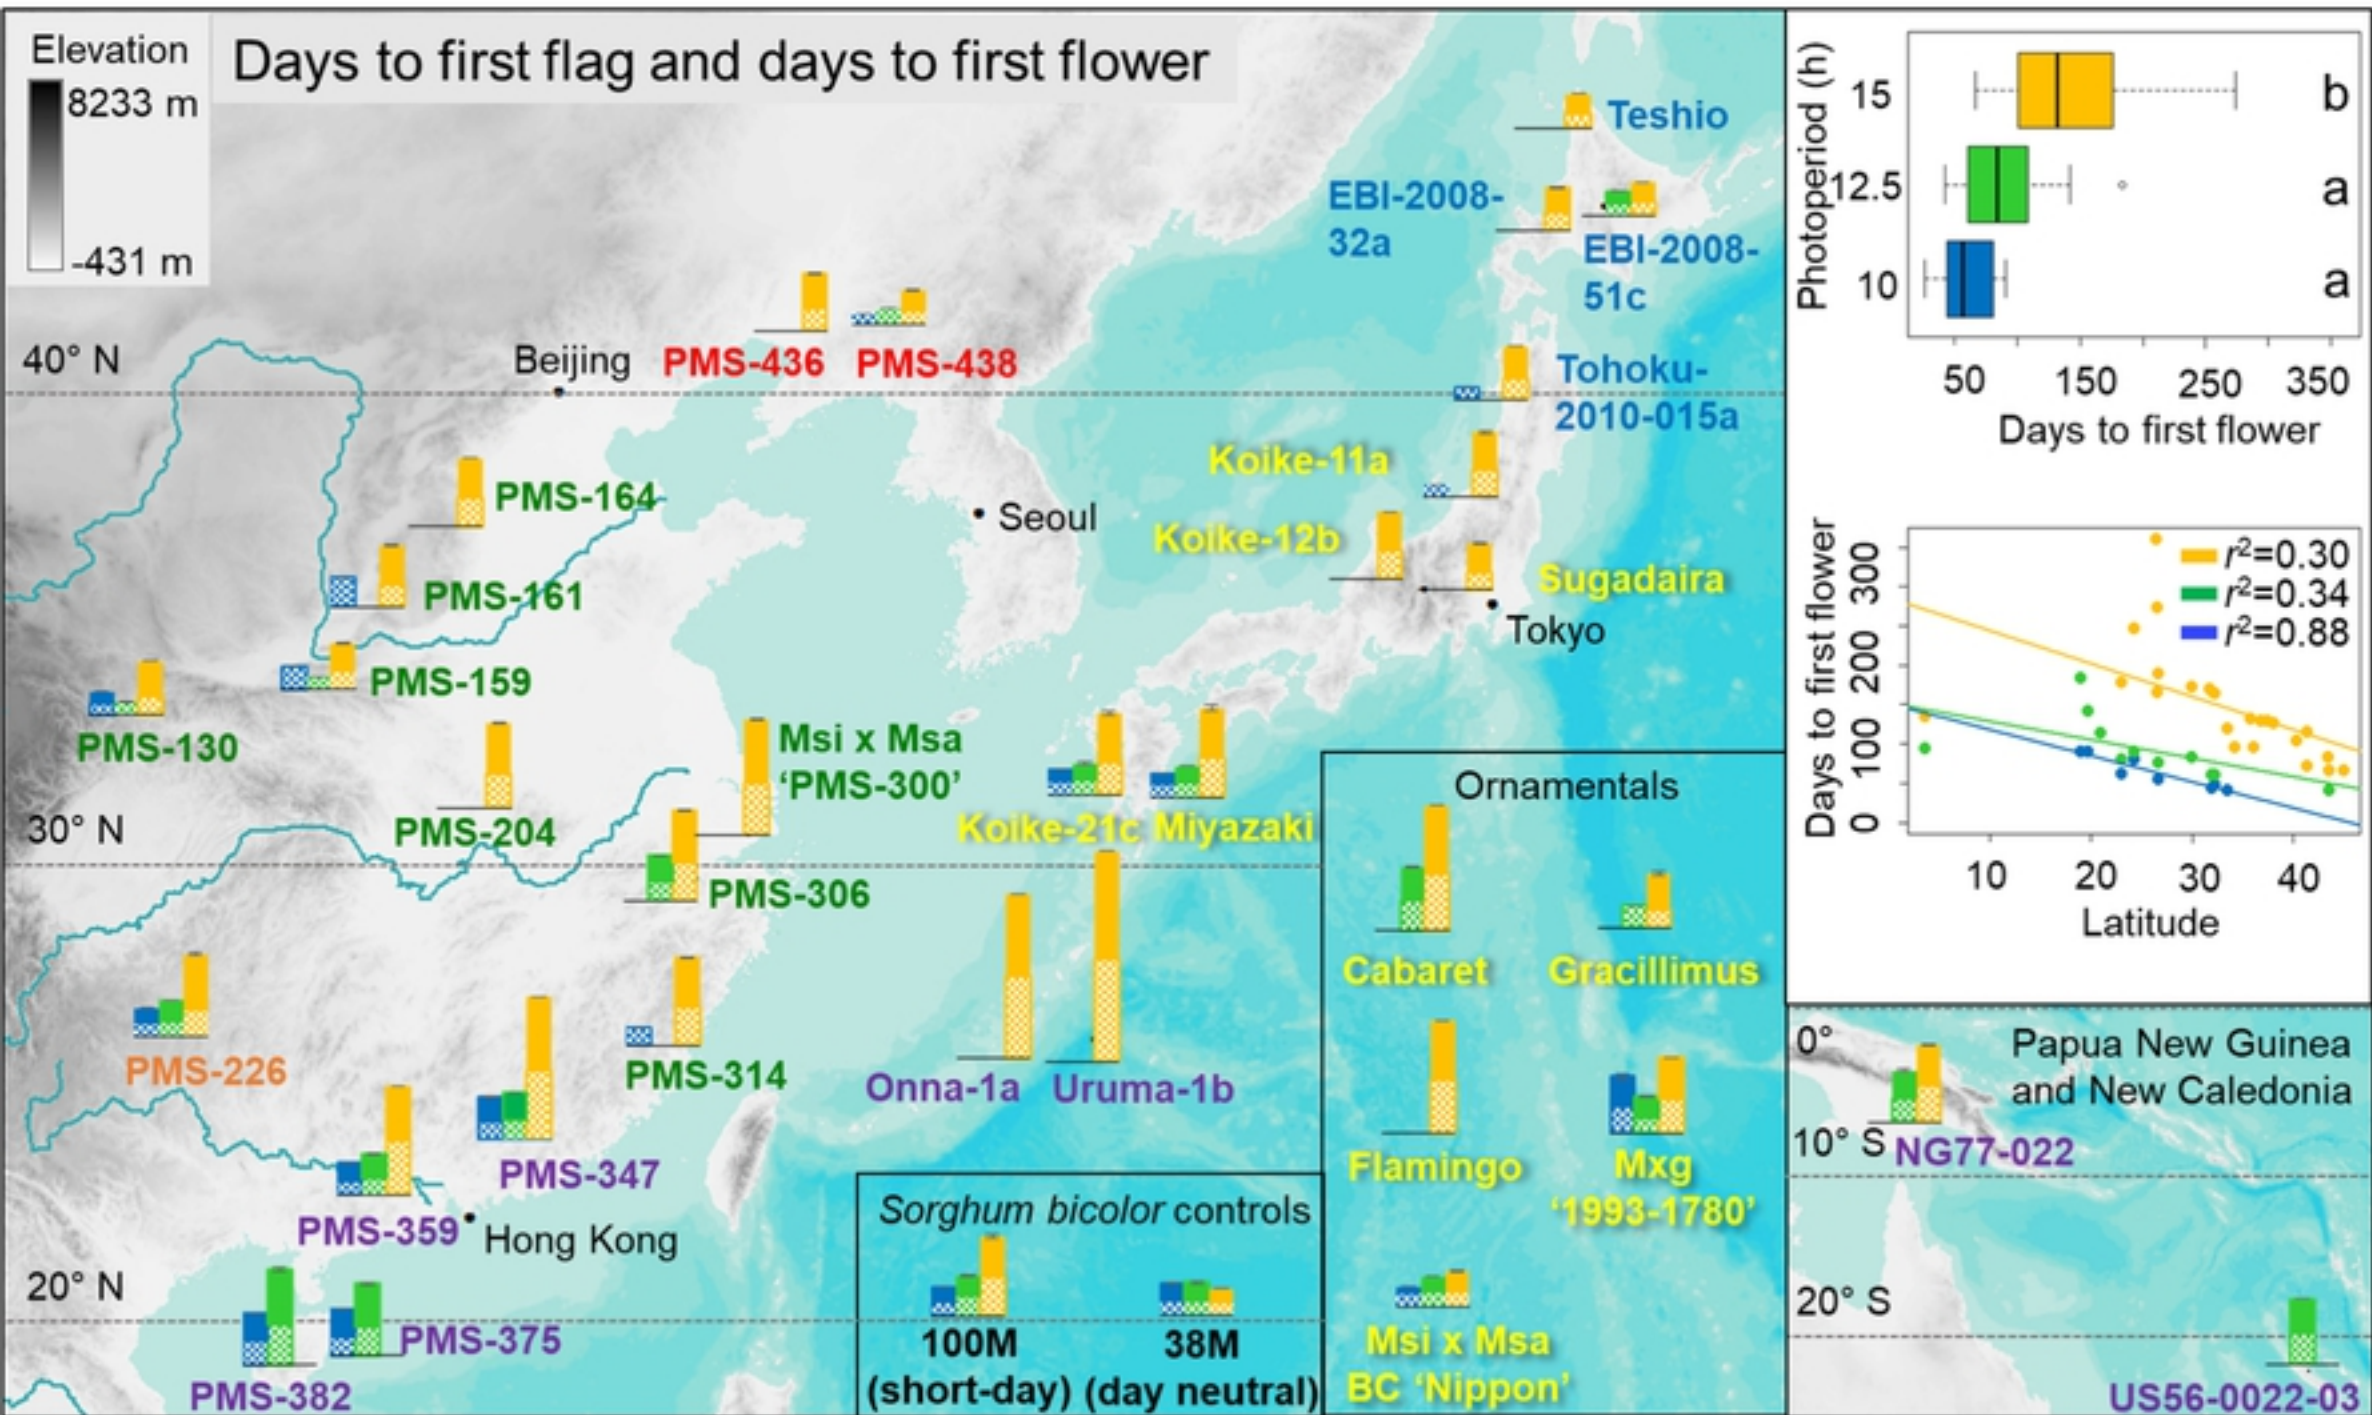

Figure



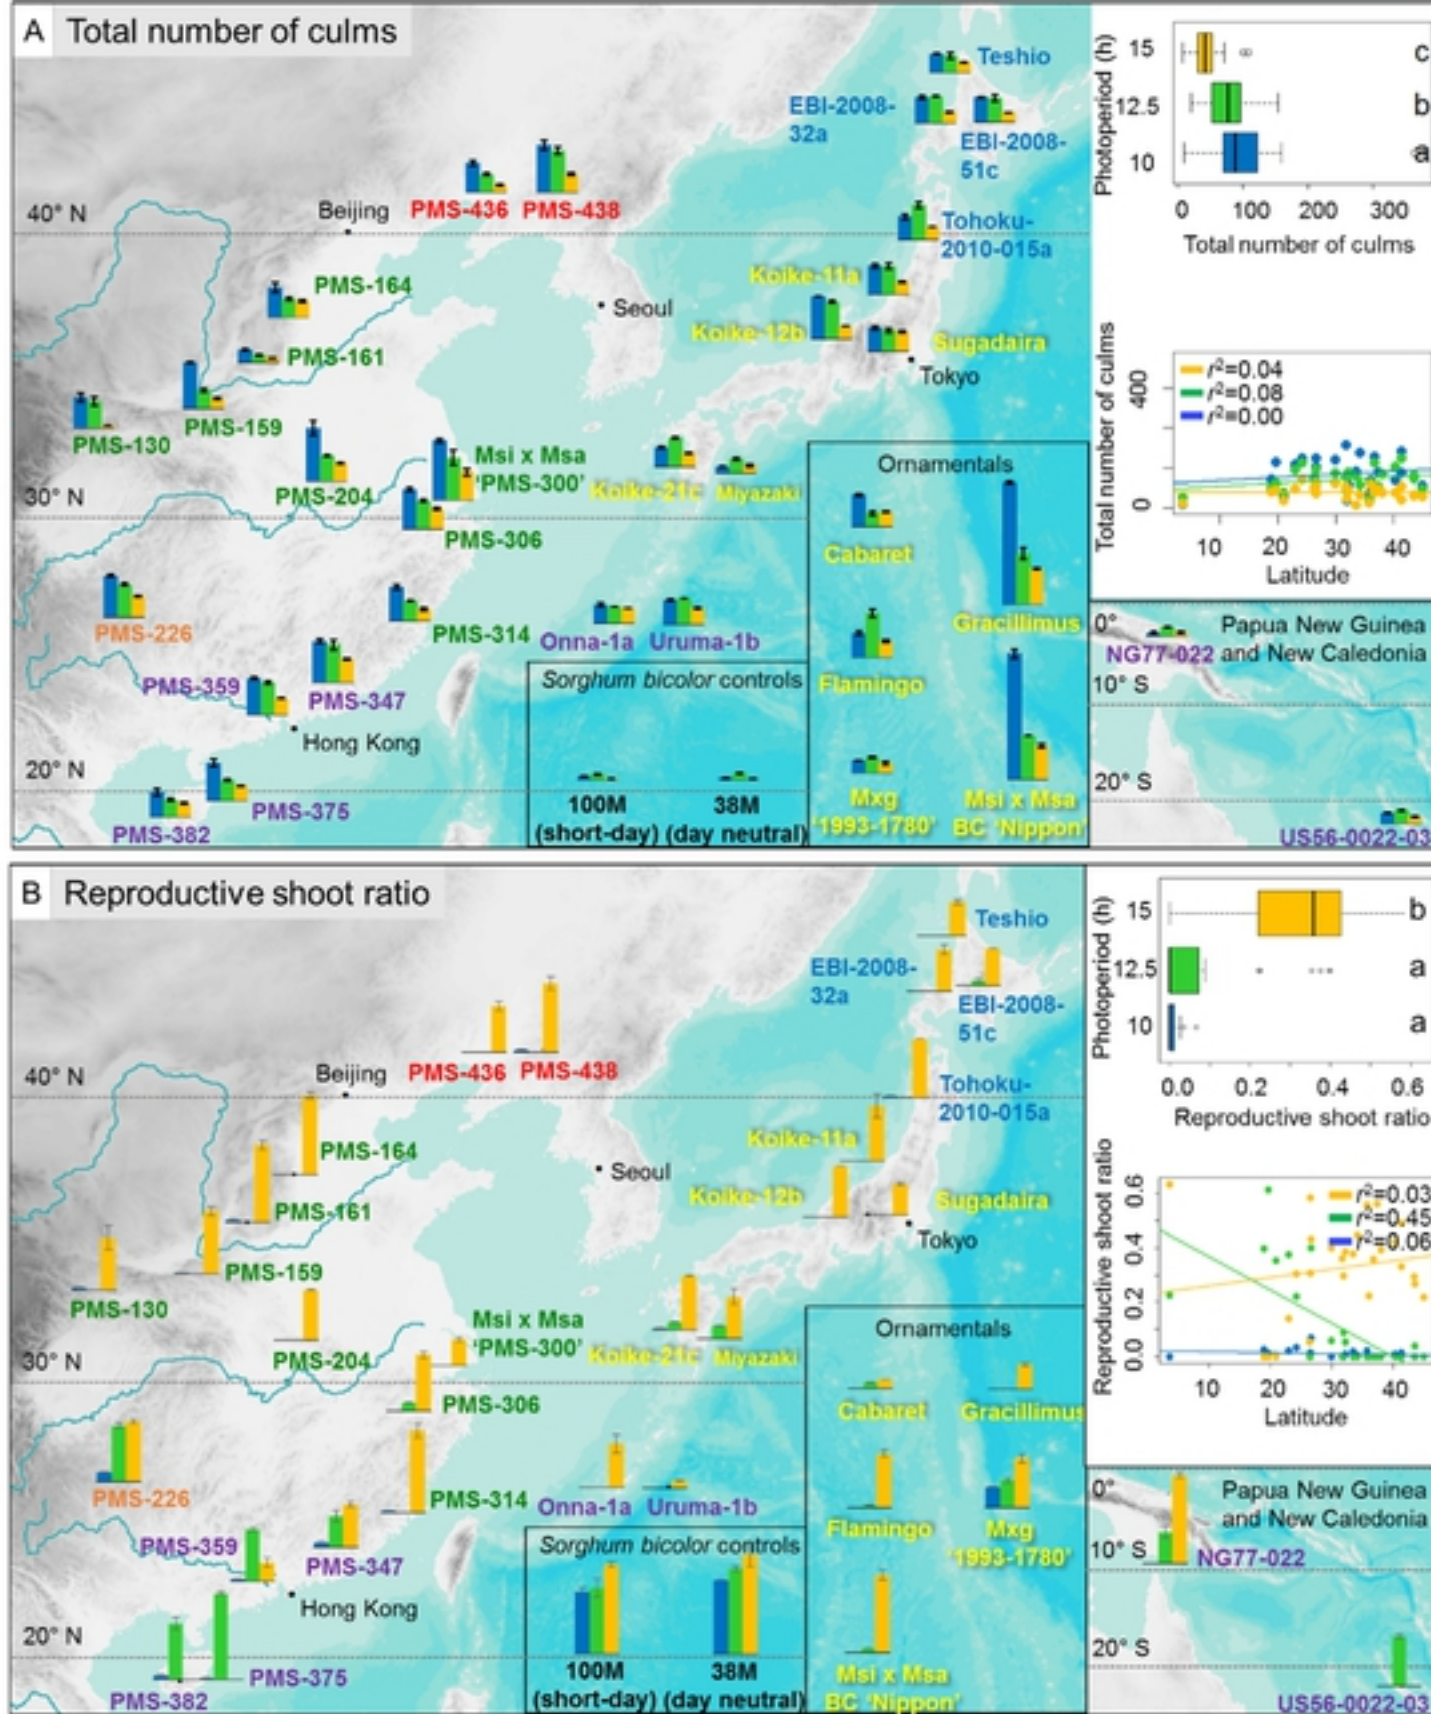

Figure



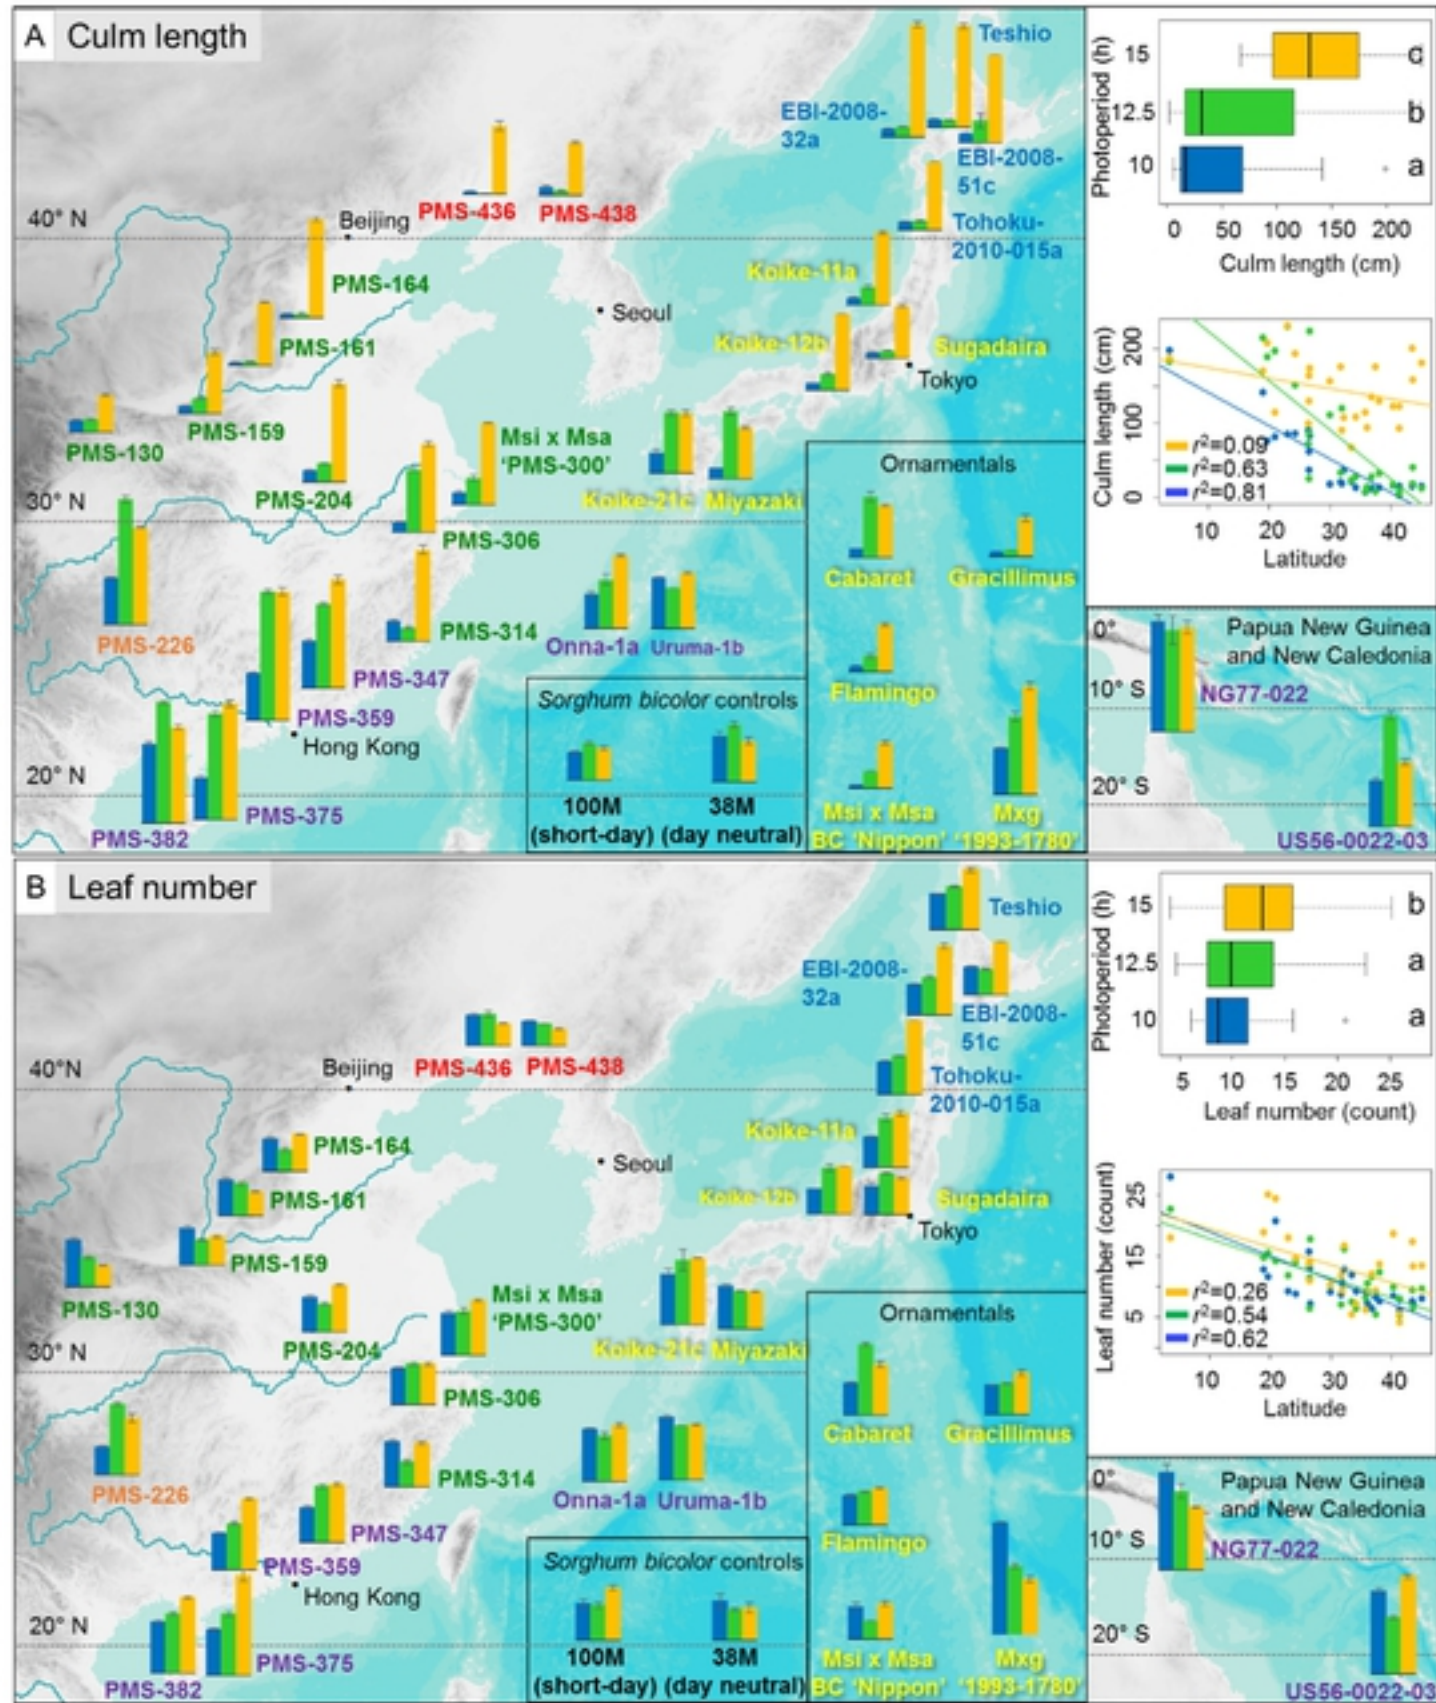

Figure

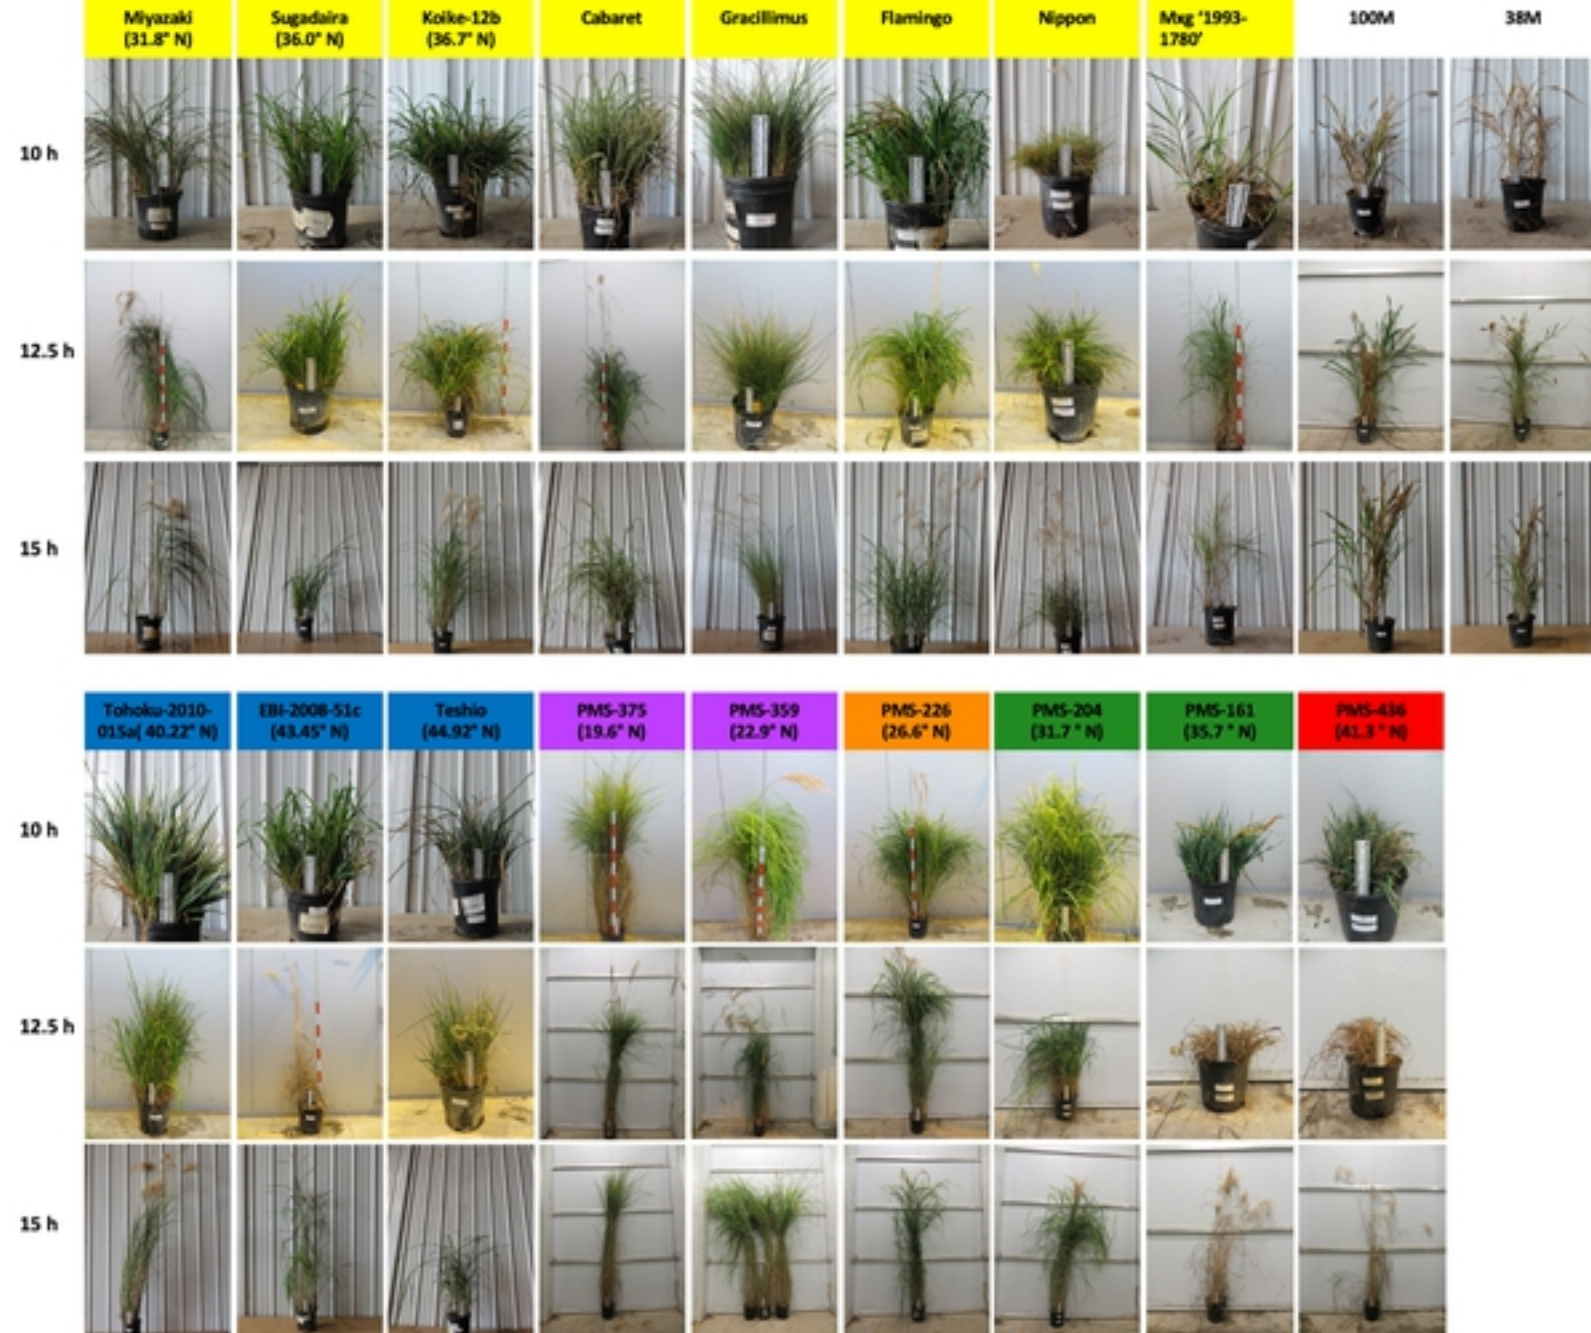

Figure
